# Supplementary material for: Association of Diverse Staphylococcus aureus Populations with Pseudomonas aeruginosa Coinfection and Inflammation in Cystic Fibrosis Airway Infection
Source: PubMed Central journal article supplement (PMC8265651; doi:10.1128/msphere.00358-21), 2021-06-23
Supplement: msphere.00358-21-sf001.pdf [file msphere.00358-21-sf001.pdf]

## Patient 1

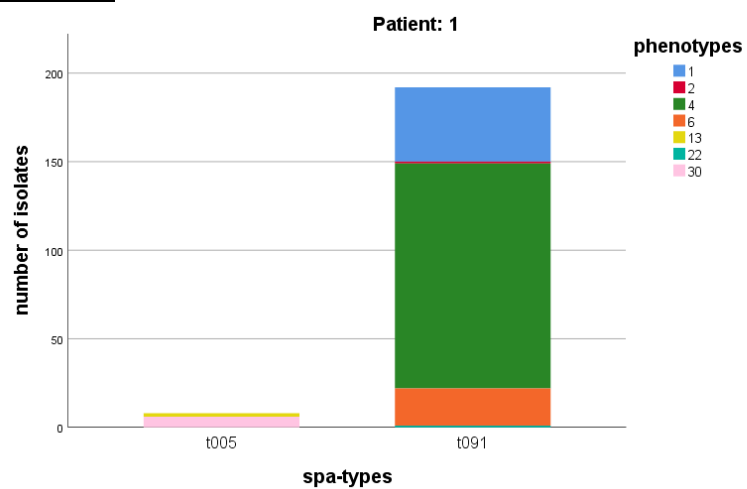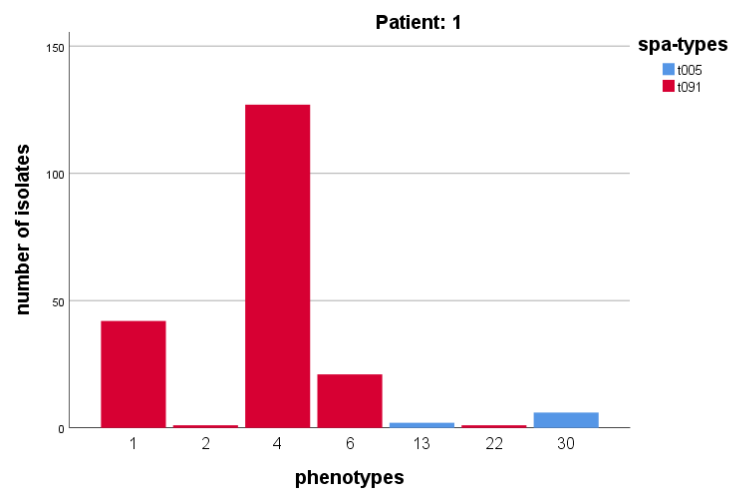

|                    |      | phenotypes |   |     |    |    |    |    |       |
|--------------------|------|------------|---|-----|----|----|----|----|-------|
| number of isolates |      | 1          | 2 | 4   | 6  | 13 | 22 | 30 | total |
| spa-types          | t005 | 0          | 0 | 0   | 0  | 2  | 0  | 6  | 8     |
|                    | t091 | 42         | 1 | 127 | 21 | 0  | 1  | 0  | 192   |
| total              |      | 42         | 1 | 127 | 21 | 2  | 1  | 6  | 200   |

## Patient 2

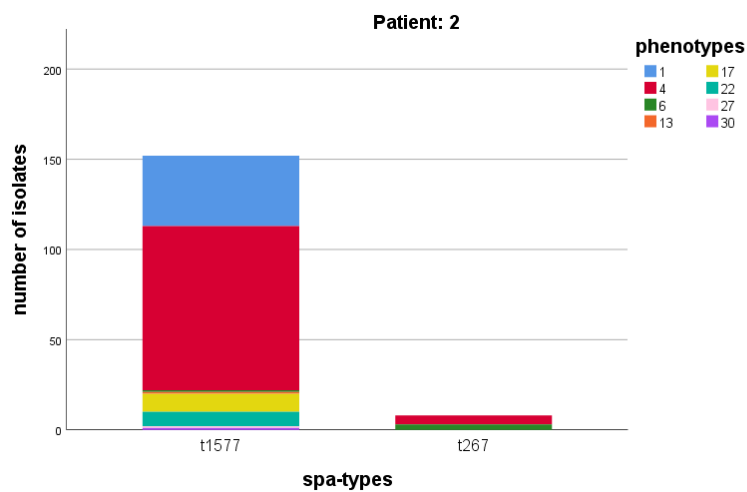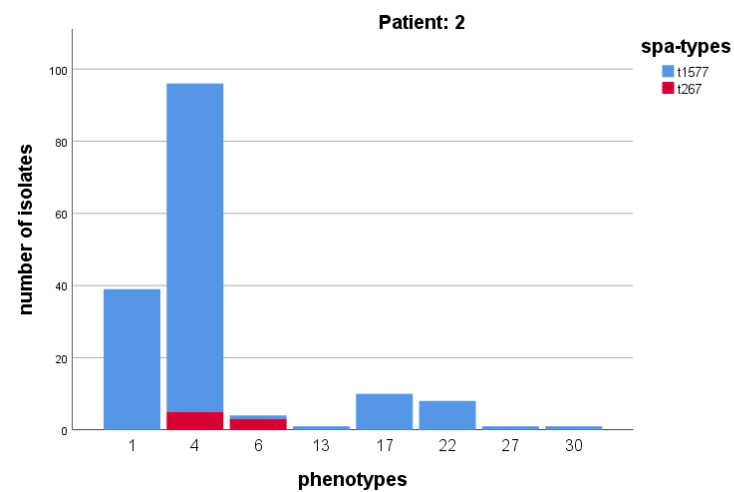

|                    |       | phenotypes |    |   |    |    |    |    |    |       |
|--------------------|-------|------------|----|---|----|----|----|----|----|-------|
| number of isolates |       | 1          | 4  | 6 | 13 | 17 | 22 | 27 | 30 | total |
| spa-types          | t1577 | 39         | 91 | 1 | 1  | 10 | 8  | 1  | 1  | 152   |
|                    | t267  | 0          | 5  | 3 | 0  | 0  | 0  | 0  | 0  | 8     |
| total              |       | 39         | 96 | 4 | 1  | 10 | 8  | 1  | 1  | 160   |

### Patient 3

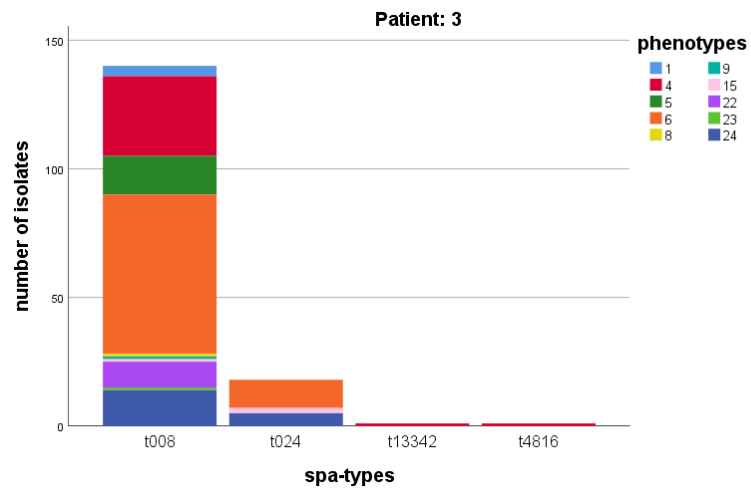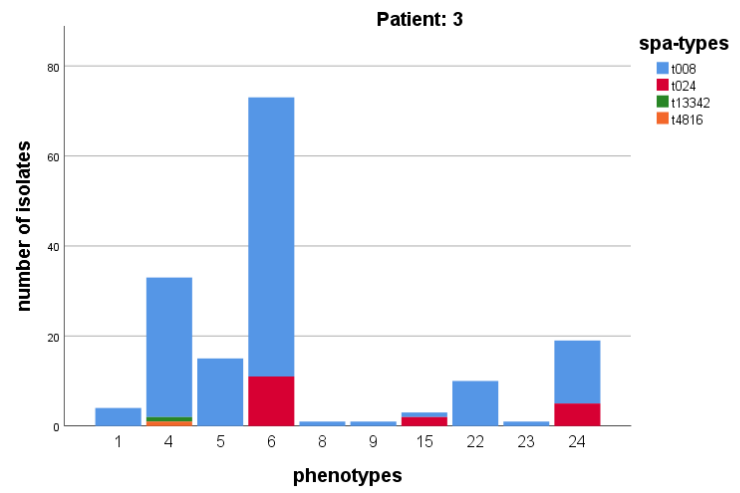

| number of isolates |        | phenotypes |    |    |    |   |   |    |    |    |    | total |
|--------------------|--------|------------|----|----|----|---|---|----|----|----|----|-------|
|                    |        | 1          | 4  | 5  | 6  | 8 | 9 | 15 | 22 | 23 | 24 |       |
| spa-types          | t008   | 4          | 31 | 15 | 62 | 1 | 1 | 1  | 10 | 1  | 14 | 140   |
|                    | t024   | 0          | 0  | 0  | 11 | 0 | 0 | 2  | 0  | 0  | 5  | 18    |
|                    | t13342 | 0          | 1  | 0  | 0  | 0 | 0 | 0  | 0  | 0  | 0  | 1     |
|                    | t4816  | 0          | 1  | 0  | 0  | 0 | 0 | 0  | 0  | 0  | 0  | 1     |
| total              |        | 4          | 33 | 15 | 73 | 1 | 1 | 3  | 10 | 1  | 19 | 160   |

## Patient 4

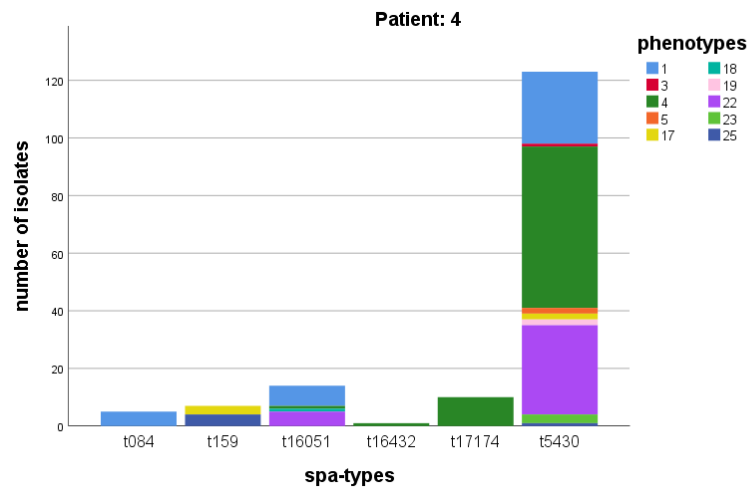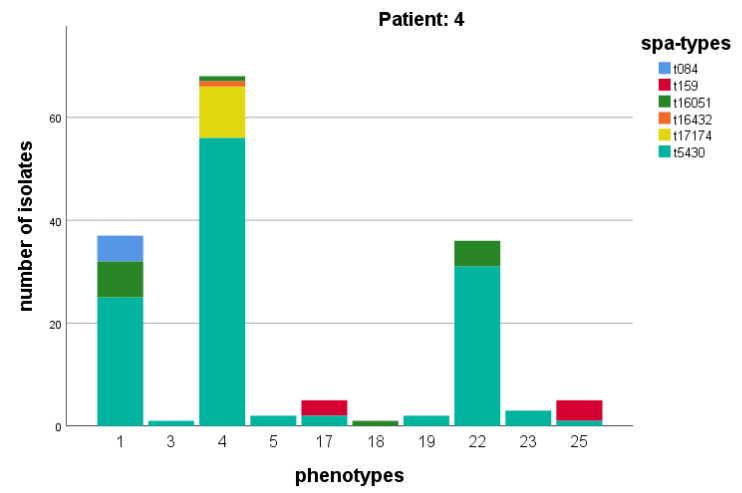

| number of isolates |        | phenotypes |   |    |   |    |    |    |    |    |    | total |
|--------------------|--------|------------|---|----|---|----|----|----|----|----|----|-------|
|                    |        | 1          | 3 | 4  | 5 | 17 | 18 | 19 | 22 | 23 | 25 |       |
| spa-types          | t084   | 5          | 0 | 0  | 0 | 0  | 0  | 0  | 0  | 0  | 0  | 5     |
|                    | t159   | 0          | 0 | 0  | 0 | 3  | 0  | 0  | 0  | 0  | 4  | 7     |
|                    | t16051 | 7          | 0 | 1  | 0 | 0  | 1  | 0  | 5  | 0  | 0  | 14    |
|                    | t16432 | 0          | 0 | 1  | 0 | 0  | 0  | 0  | 0  | 0  | 0  | 1     |
|                    | t17174 | 0          | 0 | 10 | 0 | 0  | 0  | 0  | 0  | 0  | 0  | 10    |
|                    | t5430  | 25         | 1 | 56 | 2 | 2  | 0  | 2  | 31 | 3  | 1  | 123   |
| total              |        | 37         | 1 | 68 | 2 | 5  | 1  | 2  | 36 | 3  | 5  | 160   |

## Patient 5

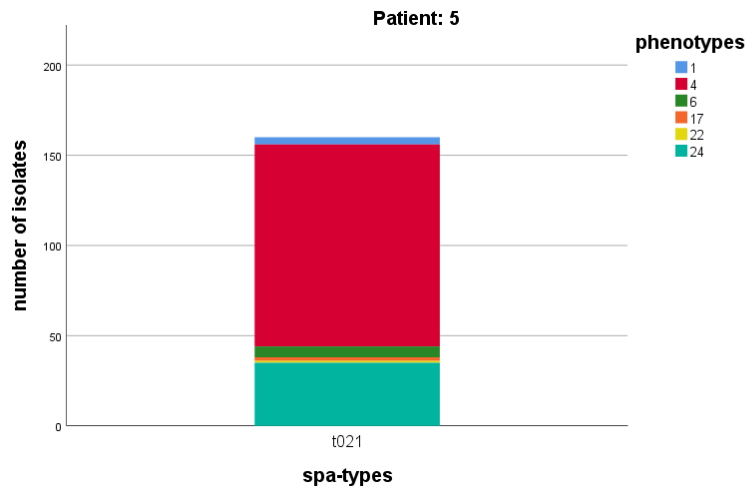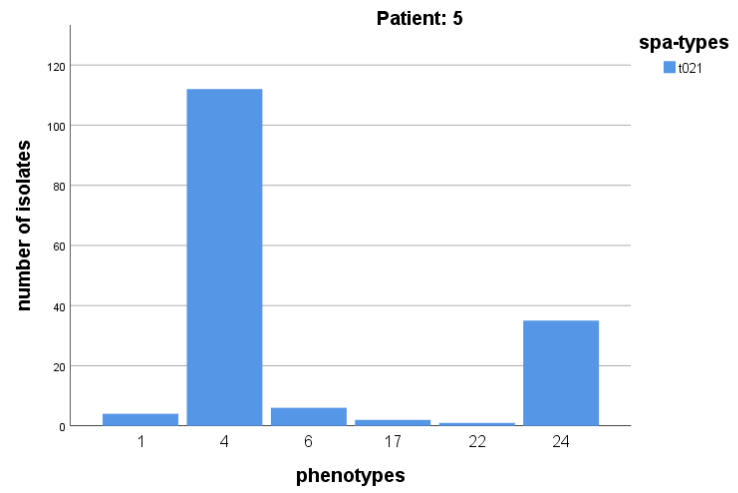

| number of isolates |      | phenotypes |     |   |    |    |    | total |
|--------------------|------|------------|-----|---|----|----|----|-------|
|                    |      | 1          | 4   | 6 | 17 | 22 | 24 |       |
| spa-types          | t021 | 4          | 112 | 6 | 2  | 1  | 35 | 160   |
| total              |      | 4          | 112 | 6 | 2  | 1  | 35 | 160   |

## Patient 6

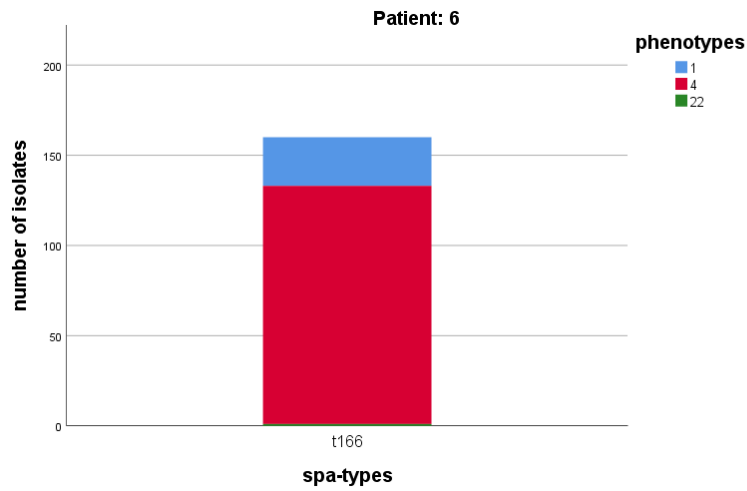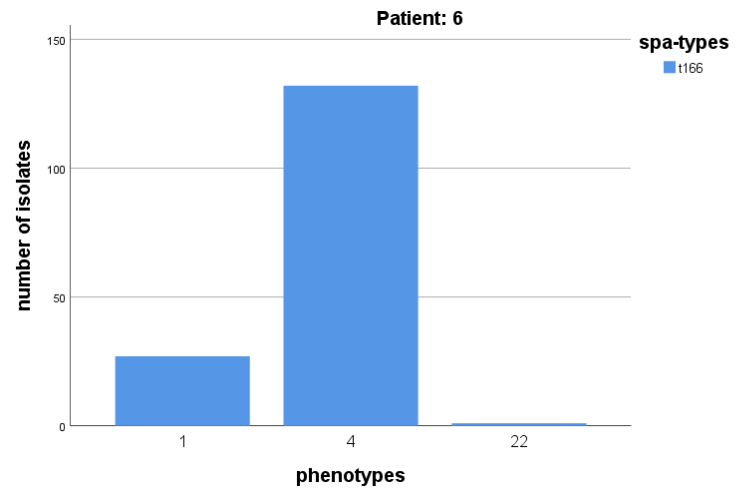

| number of isolates |      | phenotypes |     |    | total |
|--------------------|------|------------|-----|----|-------|
|                    |      | 1          | 4   | 22 |       |
| spa-types          | t166 | 27         | 132 | 1  | 160   |
| total              |      | 27         | 132 | 1  | 160   |

## Patient 7

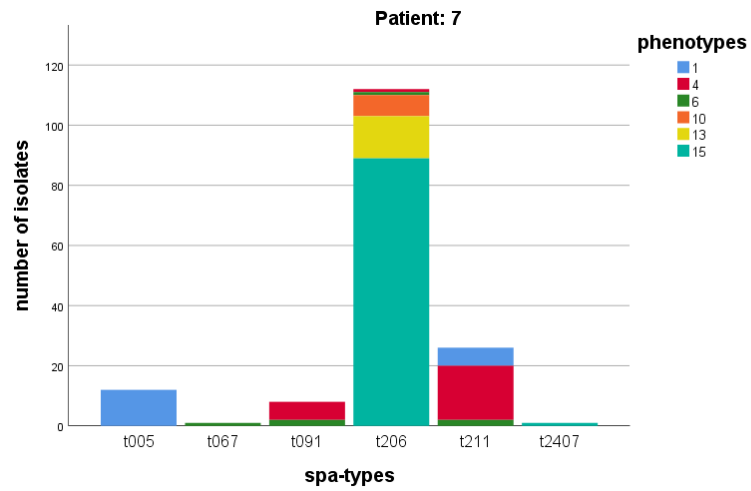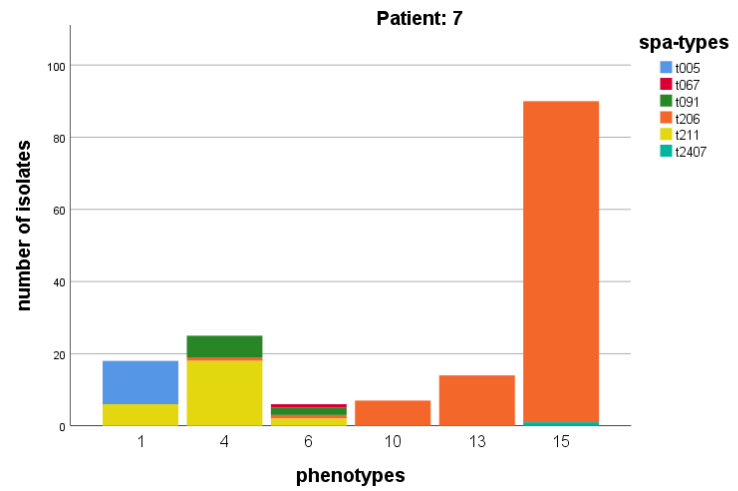

| number of isolates |       | phenotypes |    |   |    |    |    | total |
|--------------------|-------|------------|----|---|----|----|----|-------|
|                    |       | 1          | 4  | 6 | 10 | 13 | 15 |       |
| spa-types          | t005  | 12         | 0  | 0 | 0  | 0  | 0  | 12    |
|                    | t067  | 0          | 0  | 1 | 0  | 0  | 0  | 1     |
|                    | t091  | 0          | 6  | 2 | 0  | 0  | 0  | 8     |
|                    | t206  | 0          | 1  | 1 | 7  | 14 | 89 | 112   |
|                    | t211  | 6          | 18 | 2 | 0  | 0  | 0  | 26    |
|                    | t2407 | 0          | 0  | 0 | 0  | 0  | 1  | 1     |
| total              |       | 18         | 25 | 6 | 7  | 14 | 90 | 160   |

## Patient 8

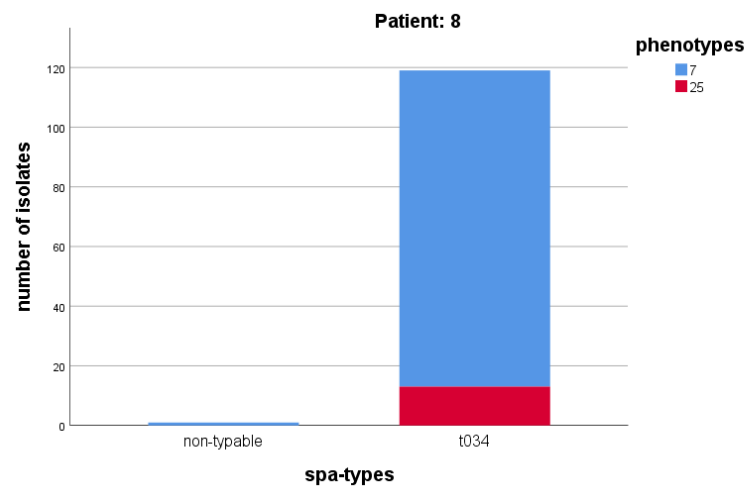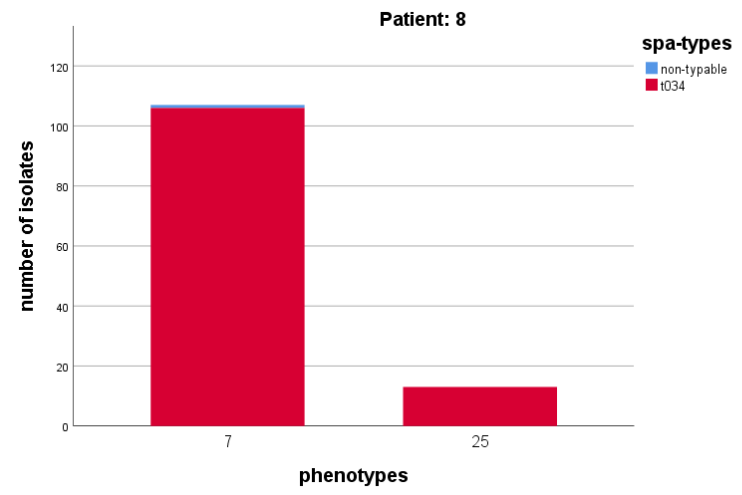

|           |             | phenotypes |    | total |
|-----------|-------------|------------|----|-------|
|           |             | 7          | 25 |       |
| spa-types | non-typable | 1          | 0  | 1     |
|           | t034        | 106        | 13 | 119   |
| total     |             | 107        | 13 | 120   |

## Patient 9

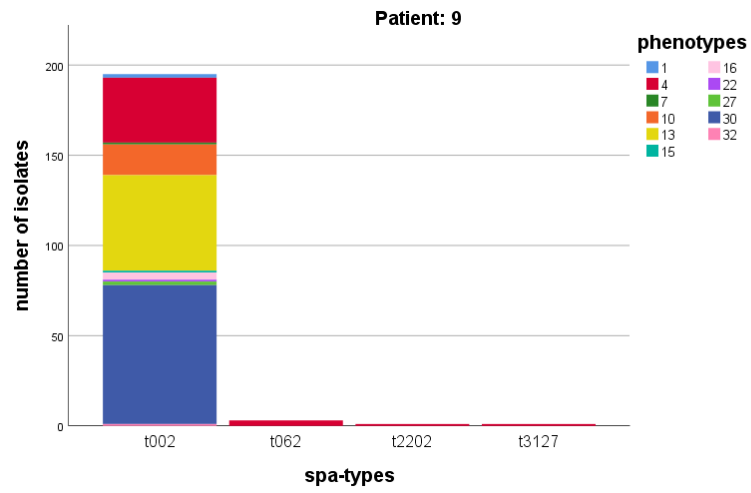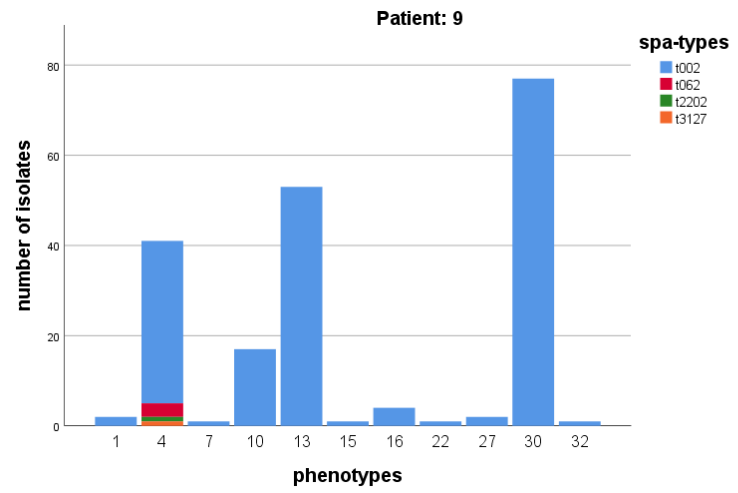

| number of isolates |       | phenotypes |    |   |    |    |    |    |    |    |    |    | total |
|--------------------|-------|------------|----|---|----|----|----|----|----|----|----|----|-------|
|                    |       | 1          | 4  | 7 | 10 | 13 | 15 | 16 | 22 | 27 | 30 | 32 |       |
| spa-types          | t002  | 2          | 36 | 1 | 17 | 53 | 1  | 4  | 1  | 2  | 77 | 1  | 195   |
|                    | t062  | 0          | 3  | 0 | 0  | 0  | 0  | 0  | 0  | 0  | 0  | 0  | 3     |
|                    | t2202 | 0          | 1  | 0 | 0  | 0  | 0  | 0  | 0  | 0  | 0  | 0  | 1     |
|                    | t3127 | 0          | 1  | 0 | 0  | 0  | 0  | 0  | 0  | 0  | 0  | 0  | 1     |
| total              |       | 2          | 41 | 1 | 17 | 53 | 1  | 4  | 1  | 2  | 77 | 1  | 200   |

## Patient 10

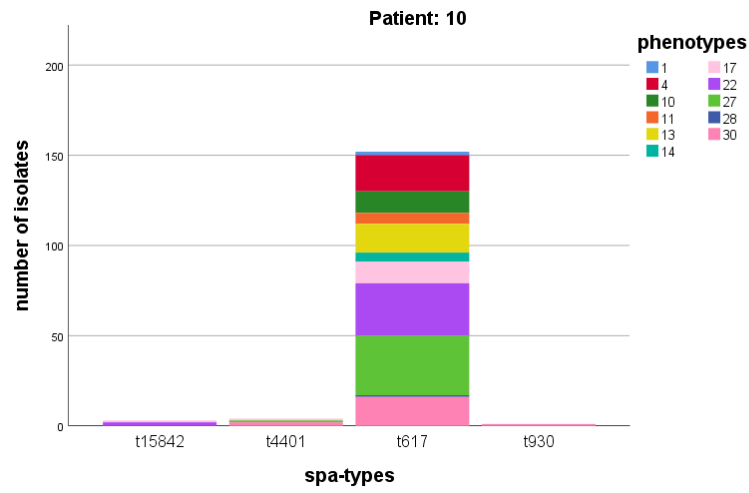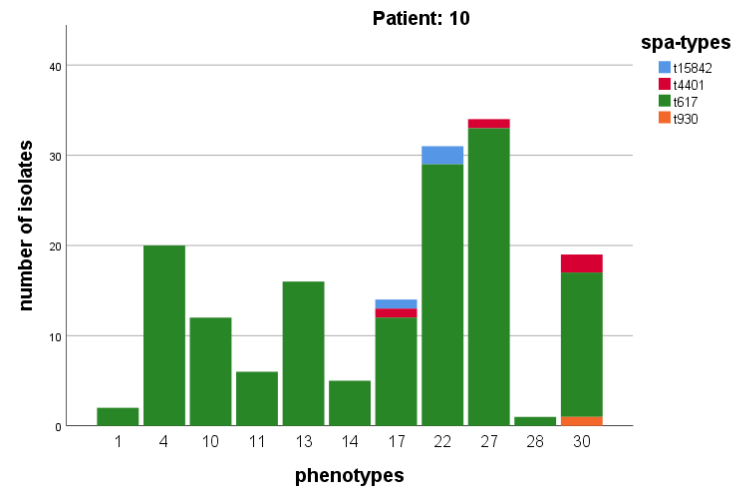

|                    |        | phenotypes |    |    |    |    |    |    |    |    |    |    |       |
|--------------------|--------|------------|----|----|----|----|----|----|----|----|----|----|-------|
| number of isolates |        | 1          | 4  | 10 | 11 | 13 | 14 | 17 | 22 | 27 | 28 | 30 | total |
| spa-types          | t15842 | 0          | 0  | 0  | 0  | 0  | 0  | 1  | 2  | 0  | 0  | 0  | 3     |
|                    | t4401  | 0          | 0  | 0  | 0  | 0  | 0  | 1  | 0  | 1  | 0  | 2  | 4     |
|                    | t617   | 2          | 20 | 12 | 6  | 16 | 5  | 12 | 29 | 33 | 1  | 16 | 152   |
|                    | t930   | 0          | 0  | 0  | 0  | 0  | 0  | 0  | 0  | 0  | 0  | 1  | 1     |
| total              |        | 2          | 20 | 12 | 6  | 16 | 5  | 14 | 31 | 34 | 1  | 19 | 160   |



## Patient 11

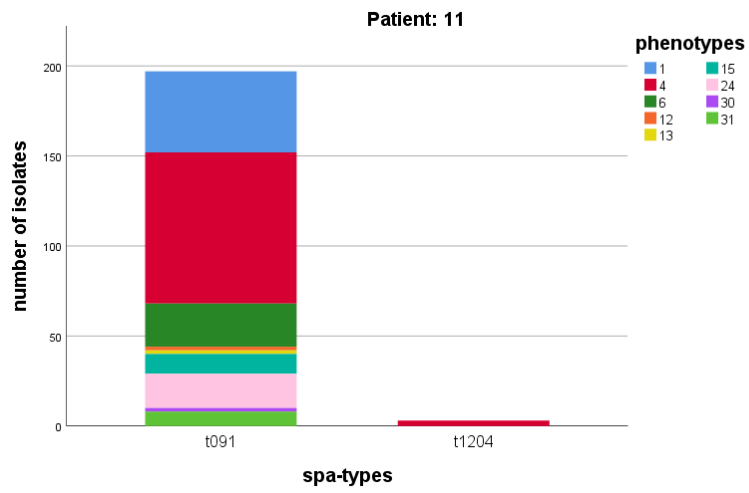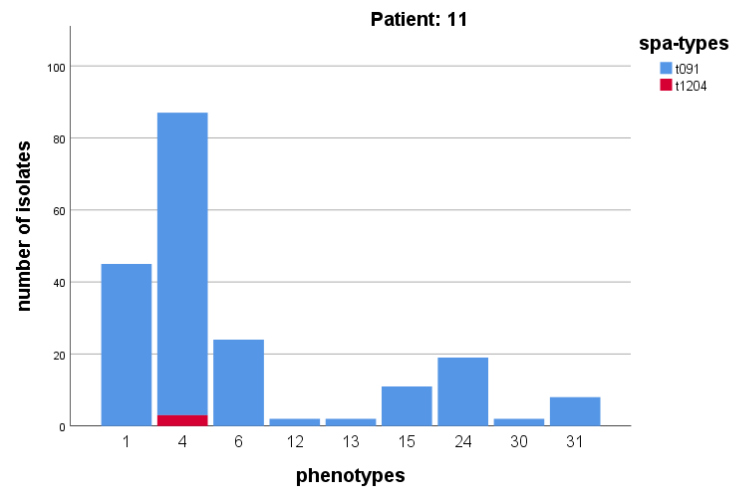

| number of isolates |       | phenotypes |    |    |    |    |    |    |    |    | total |
|--------------------|-------|------------|----|----|----|----|----|----|----|----|-------|
|                    |       | 1          | 4  | 6  | 12 | 13 | 15 | 24 | 30 | 31 |       |
| spa-types          | t091  | 45         | 84 | 24 | 2  | 2  | 11 | 19 | 2  | 8  | 197   |
|                    | t1204 | 0          | 3  | 0  | 0  | 0  | 0  | 0  | 0  | 0  | 3     |
| total              |       | 45         | 87 | 24 | 2  | 2  | 11 | 19 | 2  | 8  | 200   |

## Patient 12

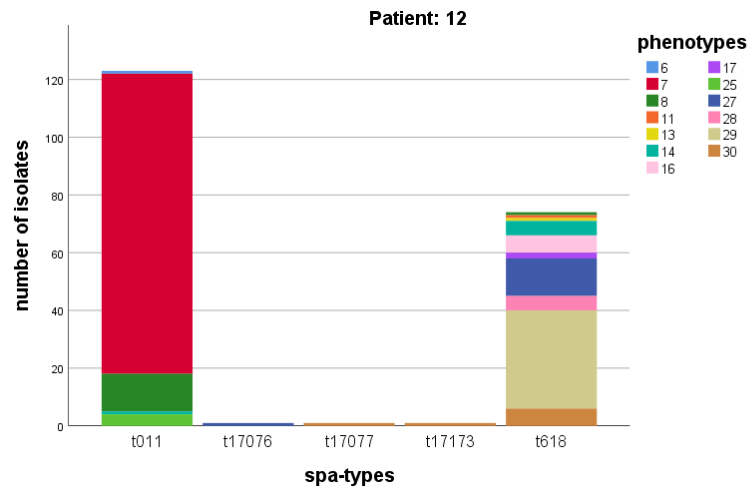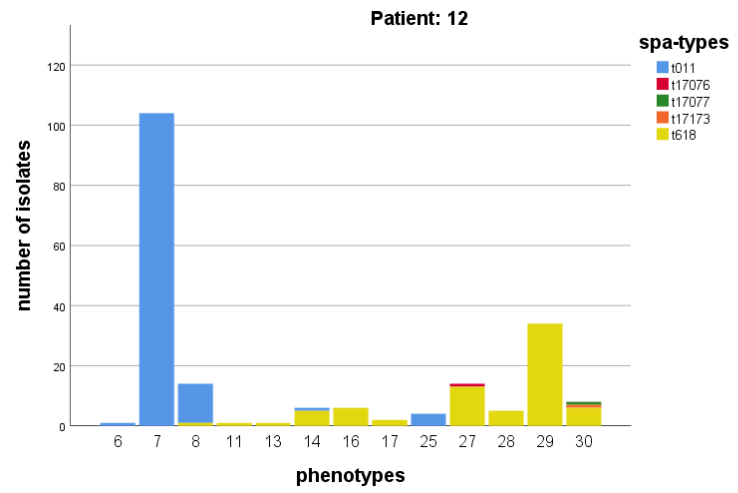

|                    |        | phenotypes |     |    |    |    |    |    |    |    |    |    |    |    |       |
|--------------------|--------|------------|-----|----|----|----|----|----|----|----|----|----|----|----|-------|
| number of isolates |        | 6          | 7   | 8  | 11 | 13 | 14 | 16 | 17 | 25 | 27 | 28 | 29 | 30 | total |
| spa-types          | t011   | 1          | 104 | 13 | 0  | 0  | 1  | 0  | 0  | 4  | 0  | 0  | 0  | 0  | 123   |
|                    | t17076 | 0          | 0   | 0  | 0  | 0  | 0  | 0  | 0  | 0  | 1  | 0  | 0  | 0  | 1     |
|                    | t17077 | 0          | 0   | 0  | 0  | 0  | 0  | 0  | 0  | 0  | 0  | 0  | 0  | 1  | 1     |
|                    | t17173 | 0          | 0   | 0  | 0  | 0  | 0  | 0  | 0  | 0  | 0  | 0  | 0  | 1  | 1     |
|                    | t618   | 0          | 0   | 1  | 1  | 1  | 5  | 6  | 2  | 0  | 13 | 5  | 34 | 6  | 74    |
| total              |        | 1          | 104 | 14 | 1  | 1  | 6  | 6  | 2  | 4  | 14 | 5  | 34 | 8  | 200   |

# Patient 13

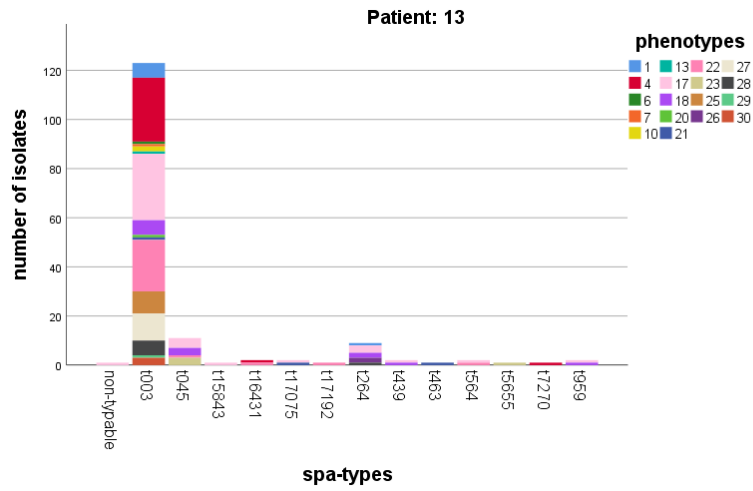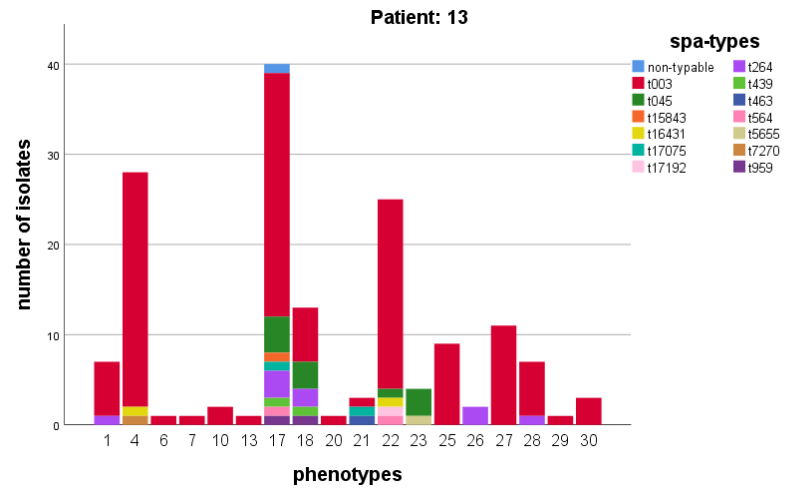

| number of isolates    | phenotypes |    |   |   |    |    |    |    |    |    |    |    |    |    |    |    |    |    |   |   | Gesamt |
|-----------------------|------------|----|---|---|----|----|----|----|----|----|----|----|----|----|----|----|----|----|---|---|--------|
|                       | 1          | 4  | 6 | 7 | 10 | 13 | 17 | 18 | 20 | 21 | 22 | 23 | 25 | 26 | 27 | 28 | 29 | 30 |   |   |        |
| spa-types non-typable | 0          | 0  | 0 | 0 | 0  | 0  | 1  | 0  | 0  | 0  | 0  | 0  | 0  | 0  | 0  | 0  | 0  | 0  | 0 | 0 | 1      |
| t003                  | 6          | 26 | 1 | 1 | 2  | 1  | 27 | 6  | 1  | 1  | 21 | 0  | 9  | 0  | 11 | 6  | 1  | 3  |   |   | 123    |
| t045                  | 0          | 0  | 0 | 0 | 0  | 0  | 4  | 3  | 0  | 0  | 1  | 3  | 0  | 0  | 0  | 0  | 0  | 0  | 0 | 0 | 11     |
| t15843                | 0          | 0  | 0 | 0 | 0  | 0  | 1  | 0  | 0  | 0  | 0  | 0  | 0  | 0  | 0  | 0  | 0  | 0  | 0 | 0 | 1      |
| t16431                | 0          | 1  | 0 | 0 | 0  | 0  | 0  | 0  | 0  | 0  | 1  | 0  | 0  | 0  | 0  | 0  | 0  | 0  | 0 | 0 | 2      |
| t17075                | 0          | 0  | 0 | 0 | 0  | 0  | 1  | 0  | 0  | 1  | 0  | 0  | 0  | 0  | 0  | 0  | 0  | 0  | 0 | 0 | 2      |
| t17192                | 0          | 0  | 0 | 0 | 0  | 0  | 0  | 0  | 0  | 0  | 1  | 0  | 0  | 0  | 0  | 0  | 0  | 0  | 0 | 0 | 1      |
| t264                  | 1          | 0  | 0 | 0 | 0  | 0  | 3  | 2  | 0  | 0  | 0  | 0  | 0  | 2  | 0  | 1  | 0  | 0  | 0 | 0 | 9      |
| t439                  | 0          | 0  | 0 | 0 | 0  | 0  | 1  | 1  | 0  | 0  | 0  | 0  | 0  | 0  | 0  | 0  | 0  | 0  | 0 | 0 | 2      |
| t463                  | 0          | 0  | 0 | 0 | 0  | 0  | 0  | 0  | 0  | 1  | 0  | 0  | 0  | 0  | 0  | 0  | 0  | 0  | 0 | 0 | 1      |
| t564                  | 0          | 0  | 0 | 0 | 0  | 0  | 1  | 0  | 0  | 0  | 1  | 0  | 0  | 0  | 0  | 0  | 0  | 0  | 0 | 0 | 2      |
| t5655                 | 0          | 0  | 0 | 0 | 0  | 0  | 0  | 0  | 0  | 0  | 0  | 1  | 0  | 0  | 0  | 0  | 0  | 0  | 0 | 0 | 1      |
| t7270                 | 0          | 1  | 0 | 0 | 0  | 0  | 0  | 0  | 0  | 0  | 0  | 0  | 0  | 0  | 0  | 0  | 0  | 0  | 0 | 0 | 1      |
| t959                  | 0          | 0  | 0 | 0 | 0  | 0  | 1  | 1  | 0  | 0  | 0  | 0  | 0  | 0  | 0  | 0  | 0  | 0  | 0 | 0 | 2      |
| total                 | 7          | 28 | 1 | 1 | 2  | 1  | 40 | 13 | 1  | 3  | 25 | 4  | 9  | 2  | 11 | 7  | 1  | 3  |   |   | 159    |

## Patient 14

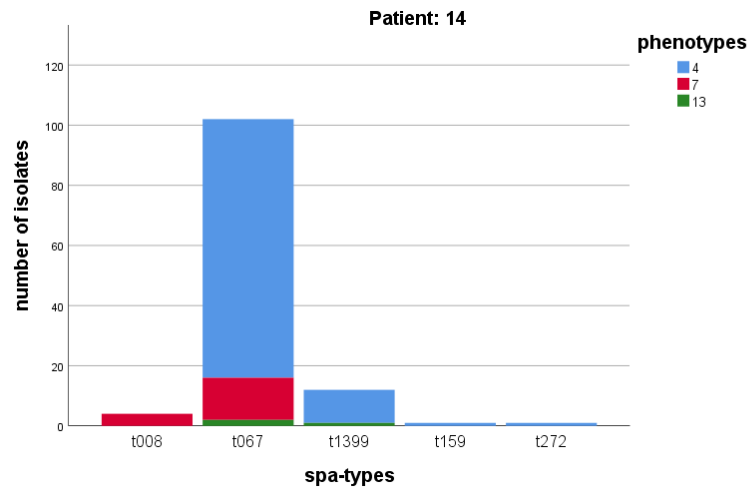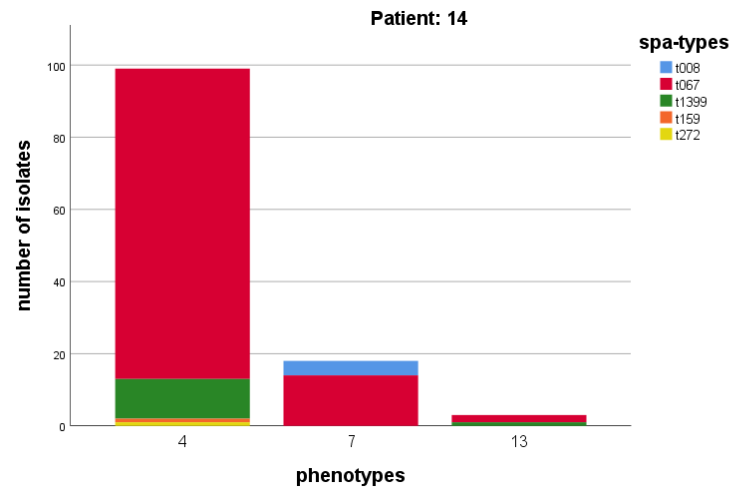

| number of isolates |       | phenotypes |    |    | total |
|--------------------|-------|------------|----|----|-------|
|                    |       | 4          | 7  | 13 |       |
| spa-types          | t008  | 0          | 4  | 0  | 4     |
|                    | t067  | 86         | 14 | 2  | 102   |
|                    | t1399 | 11         | 0  | 1  | 12    |
|                    | t159  | 1          | 0  | 0  | 1     |
|                    | t272  | 1          | 0  | 0  | 1     |
| total              |       | 99         | 18 | 3  | 120   |
