# Supplementary material for: Association of Diverse Staphylococcus aureus Populations with Pseudomonas aeruginosa Coinfection and Inflammation in Cystic Fibrosis Airway Infection
Source: PubMed Central journal article supplement (PMC8265651; doi:10.1128/msphere.00358-21), 2021-06-23
Supplement: msphere.00358-21-sf002.pdf [file msphere.00358-21-sf002.pdf]

# Patient 2

**spa type**

|                                  |
|----------------------------------|
| dominant spa type                |
| related to dominant spa type     |
| not related to dominant spa type |

**phenotype**

|          |
|----------|
| positive |
| negative |

**pigment**

|        |
|--------|
| grey   |
| white  |
| yellow |

**biofilm formation**

|       |
|-------|
| < 10% |
| > 10% |

**nuclease activity**

|         |
|---------|
| < 100 % |
| > 100 % |

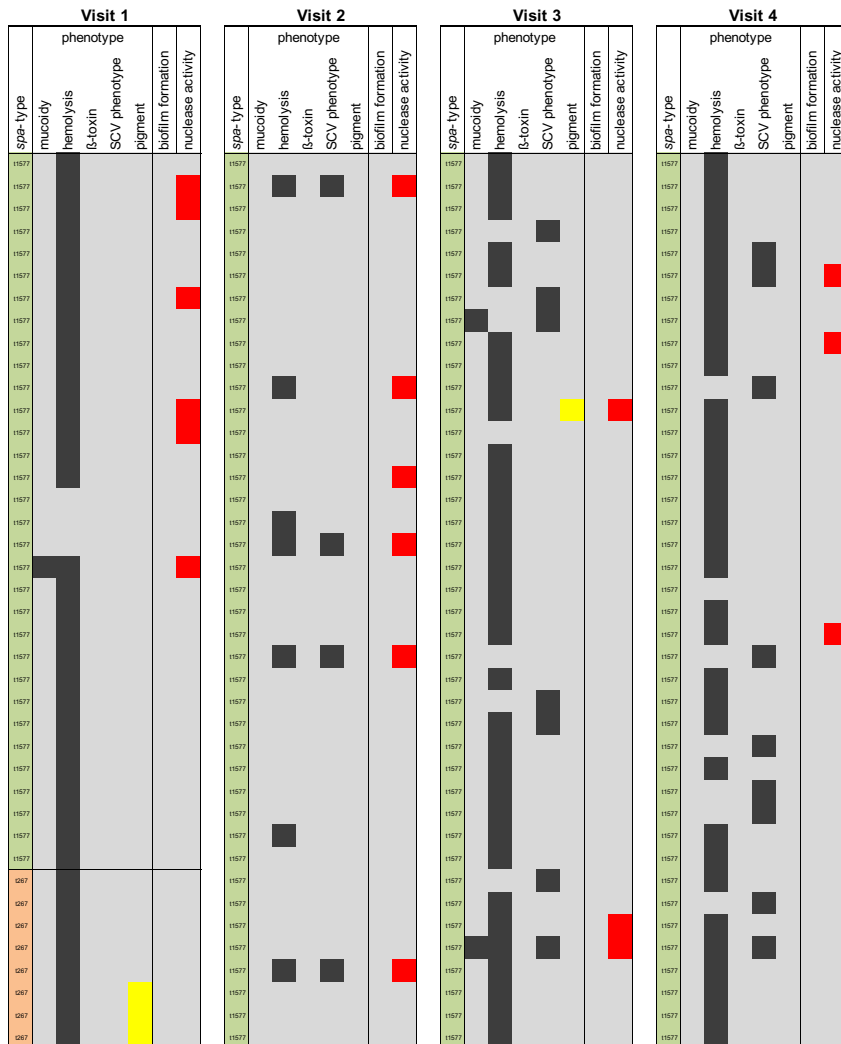

|                                         | months from first visit | 0                 | 2                 | 5                 | 8                 |
|-----------------------------------------|-------------------------|-------------------|-------------------|-------------------|-------------------|
| <b>exacerbation</b>                     |                         | -                 | -                 | +                 | +                 |
| <b><i>P. aeruginosa</i> coinfection</b> |                         | negative          | negative          | negative          | negative          |
| <b>CFU <i>S. aureus</i></b>             |                         | $9.6 \times 10^7$ | $7.2 \times 10^7$ | $1.5 \times 10^6$ | $1.6 \times 10^7$ |
| <b><i>P. aeruginosa</i></b>             |                         | 0                 | 0                 | 0                 | 0                 |

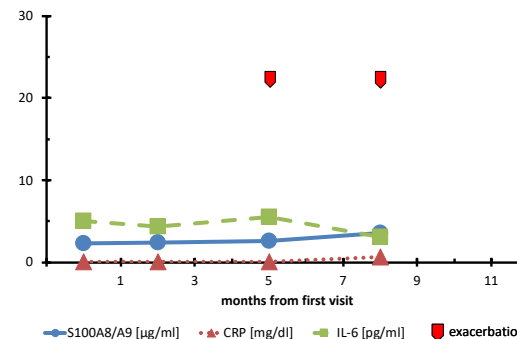

| Inflammation marker | Visit 1 | Visit 2 | Visit 3 | Visit 4 |
|---------------------|---------|---------|---------|---------|
| S100A8/A9 [µg/ml]   | 2.29    | 2.46    | 2.59    | 3.59    |
| CRP [mg/dl]         | 0.03    | 0.06    | 0.03    | 0.66    |
| IL-6 [pg/ml]        | 5.08    | 4.38    | 5.57    | 3.11    |

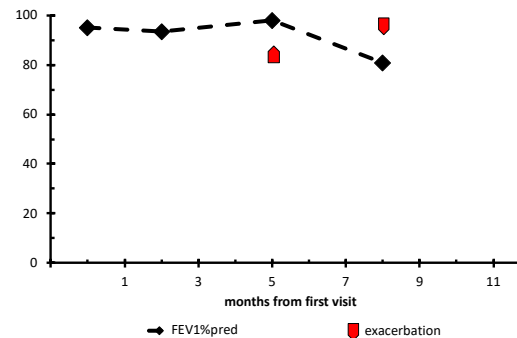

| Lung function | Visit 1 | Visit 2 | Visit 3 | Visit 4 |
|---------------|---------|---------|---------|---------|
| FEV1%pred     | 95.08   | 93.46   | 98.08   | 80.77   |

# Patient 3

**spa type**

|                                  |
|----------------------------------|
| dominant spa type                |
| related to dominant spa type     |
| not related to dominant spa type |

**phenotype**

|          |
|----------|
| positive |
| negative |

**pigment**

|        |
|--------|
| grey   |
| white  |
| yellow |

**biofilm formation**

|       |
|-------|
| < 10% |
| > 10% |

**nuclease activity**

|         |
|---------|
| < 100 % |
| > 100 % |

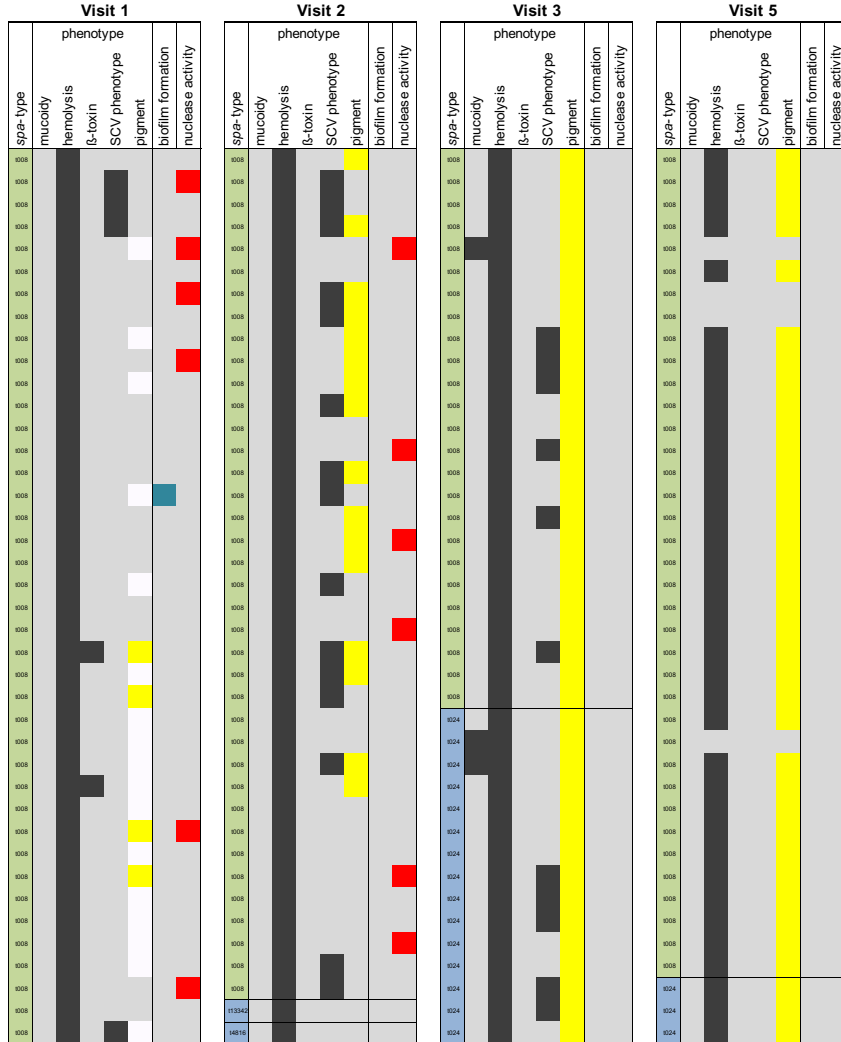

| months from first visit          | 0                 | 3                 | 7                 | 13                |
|----------------------------------|-------------------|-------------------|-------------------|-------------------|
| exacerbation                     | -                 | +                 | -                 | -                 |
| <i>P. aeruginosa</i> coinfection | chronic           | chronic           | chronic           | chronic           |
| CFU <i>S. aureus</i>             | $2.4 \times 10^7$ | $3.2 \times 10^5$ | $4.8 \times 10^3$ | $1.0 \times 10^3$ |
| CFU <i>P. aeruginosa</i>         | $1.2 \times 10^7$ | $1.2 \times 10^4$ | $4.0 \times 10^5$ | $4.0 \times 10^5$ |

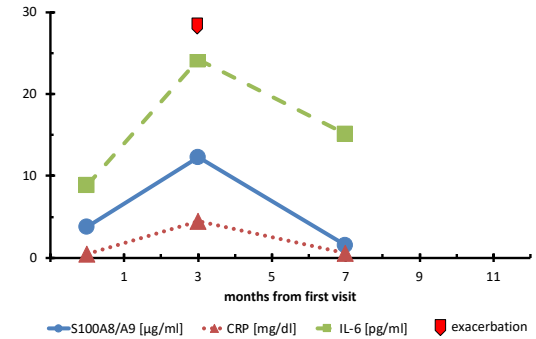

| Inflammation marker            | Visit 1 | Visit 2 | Visit 3 | Visit 5 |
|--------------------------------|---------|---------|---------|---------|
| S100A8/A9 [ $\mu\text{g/ml}$ ] | 3.80    | 12.31   | 1.58    | missing |
| CRP [mg/dl]                    | 0.49    | 4.44    | 0.54    | missing |
| IL-6 [pg/ml]                   | 8.82    | 24.20   | 15.10   | missing |

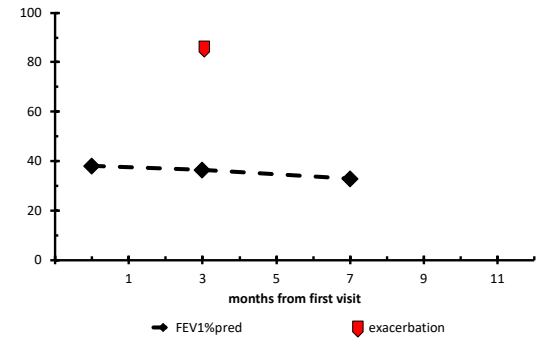

| Lung function | Visit 1 | Visit 2 | Visit 3 | Visit 5 |
|---------------|---------|---------|---------|---------|
| FEV1%pred     | 38.03   | 36.36   | 33.03   | missing |

# Patient 4

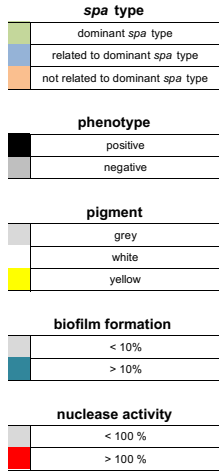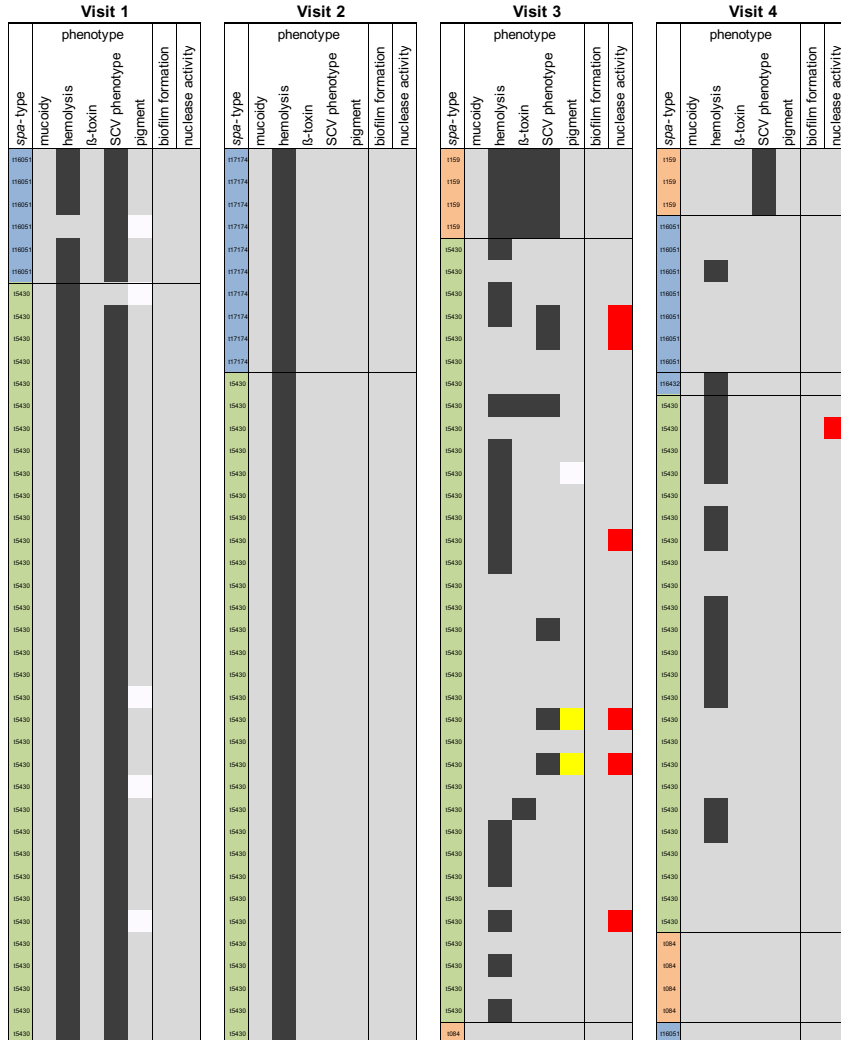

| months from first visit          | 0                 | 2                 | 5                 | 9                 |
|----------------------------------|-------------------|-------------------|-------------------|-------------------|
| exacerbation                     | -                 | -                 | +                 | -                 |
| <i>P. aeruginosa</i> coinfection | negative          | negative          | negative          | negative          |
| CFU <i>S. aureus</i>             | $1.4 \times 10^7$ | $1.2 \times 10^7$ | $4.0 \times 10^6$ | $2.2 \times 10^7$ |
| <i>P. aeruginosa</i>             | 0                 | 0                 | 0                 | 0                 |

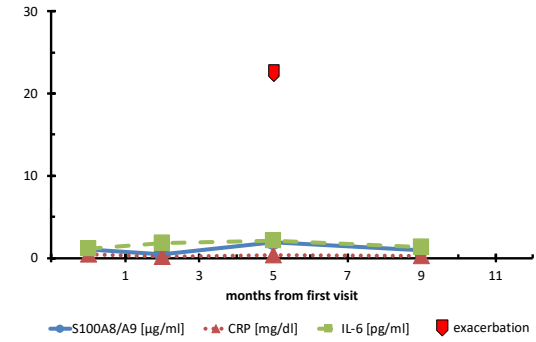

| Inflammation marker | Visit 1 | Visit 2 | Visit 3 | Visit 4 |
|---------------------|---------|---------|---------|---------|
| S100A8/A9 [µg/ml]   | 1.04    | 0.40    | 1.93    | 0.90    |
| CRP [mg/dl]         | 0.48    | 0.14    | 0.30    | 0.20    |
| IL-6 [pg/ml]        | 1.12    | 1.77    | 2.13    | 1.35    |

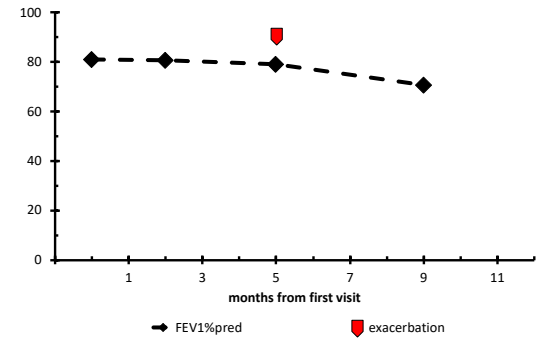

| Lung function | Visit 1 | Visit 2 | Visit 3 | Visit 4 |
|---------------|---------|---------|---------|---------|
| FEV1%pred     | 80.93   | 80.85   | 79.23   | 70.80   |

# Patient 5

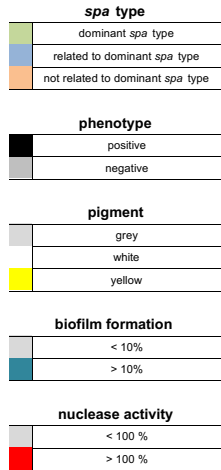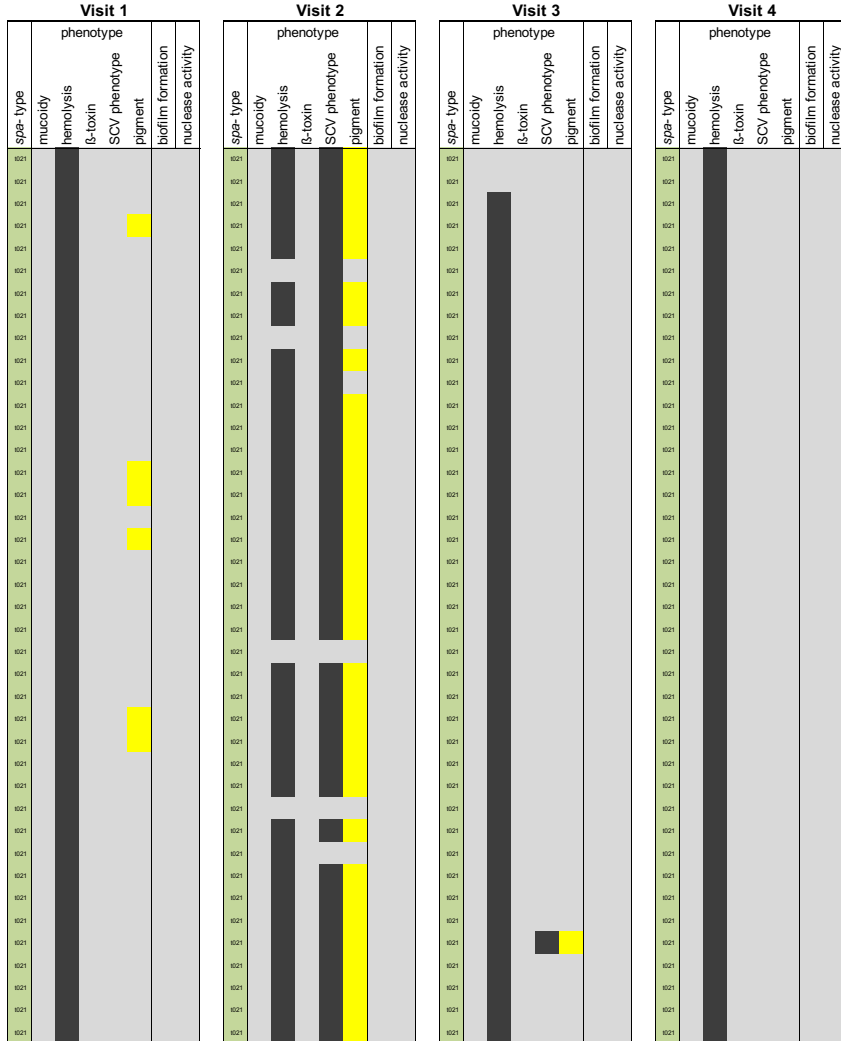

| months from first visit          | 0                 | 6                 | 9                 | 12                |
|----------------------------------|-------------------|-------------------|-------------------|-------------------|
| exacerbation                     | -                 | +                 | +                 | -                 |
| <i>P. aeruginosa</i> coinfection | chronic           | chronic           | chronic           | chronic           |
| CFU <i>S. aureus</i>             | $2.2 \times 10^4$ | $2.0 \times 10^4$ | $2.4 \times 10^6$ | $2.4 \times 10^6$ |
| CFU <i>P. aeruginosa</i>         | $4.0 \times 10^5$ | $8.0 \times 10^5$ | $1.2 \times 10^5$ | $1.2 \times 10^5$ |

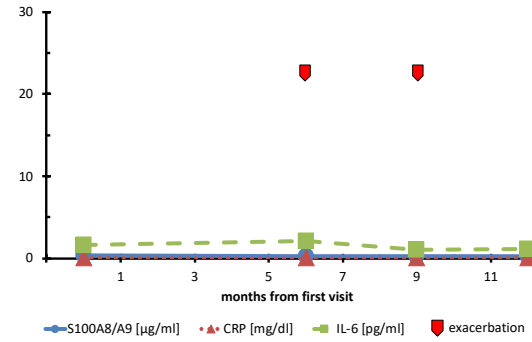

| Inflammation marker            | Visit 1 | Visit 2 | Visit 3 | Visit 4 |
|--------------------------------|---------|---------|---------|---------|
| S100A8/A9 [ $\mu\text{g/ml}$ ] | 0.35    | 0.24    | 0.22    | 0.22    |
| CRP [mg/dl]                    | 0.05    | 0.03    | 0.03    | 0.05    |
| IL-6 [pg/ml]                   | 1.61    | 2.07    | 1.03    | 1.14    |

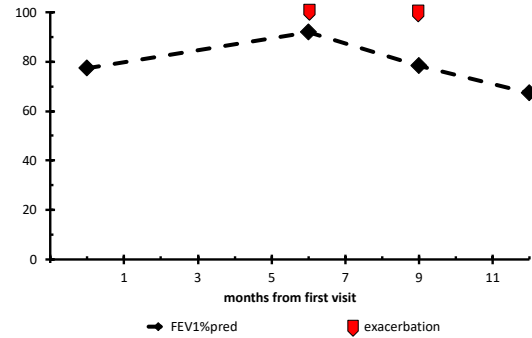

| Lung function | Visit 1 | Visit 2 | Visit 3 | Visit 4 |
|---------------|---------|---------|---------|---------|
| FEV1%pred     | 77.41   | 91.93   | 78.23   | 67.35   |

# Patient 6

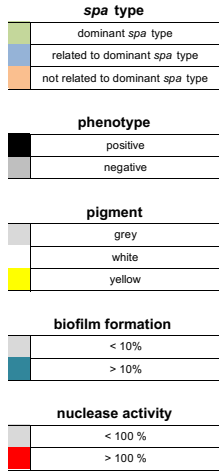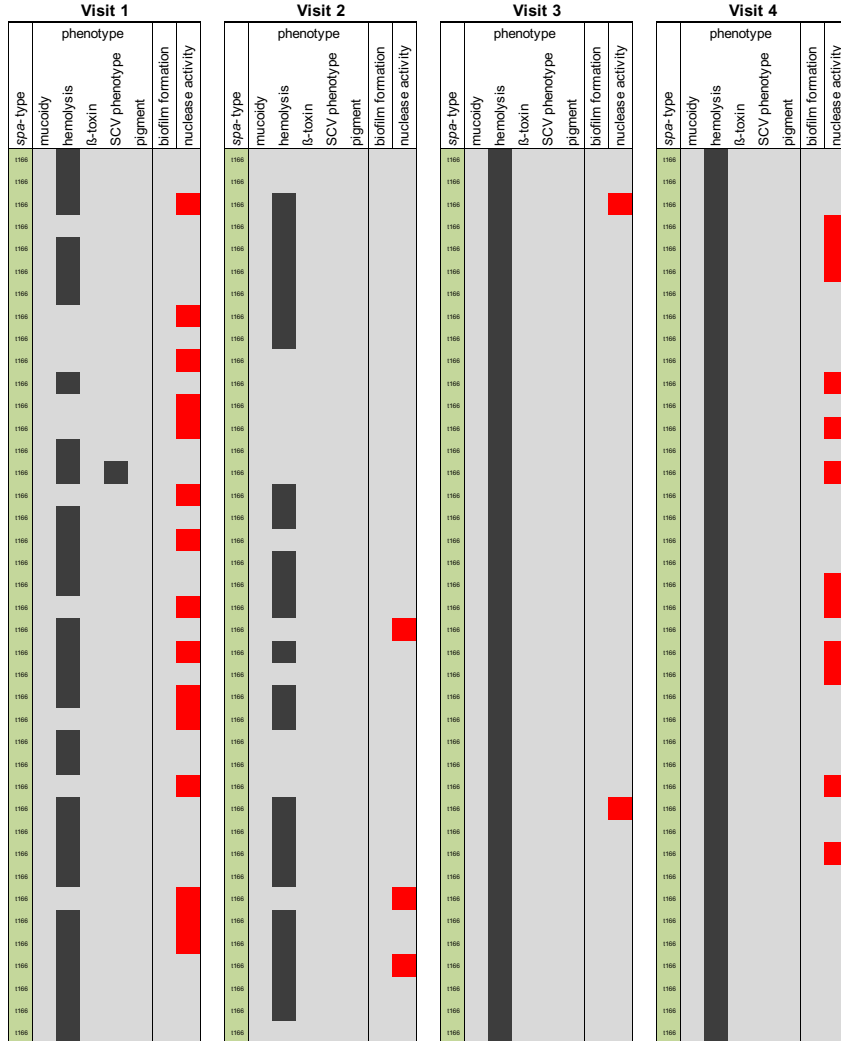

| months from first visit          | 0                 | 2                 | 6                 | 8                 |
|----------------------------------|-------------------|-------------------|-------------------|-------------------|
| exacerbation                     | -                 | +                 | -                 | -                 |
| <i>P. aeruginosa</i> coinfection | negative          | negative          | negative          | negative          |
| CFU <i>S. aureus</i>             | $3.6 \times 10^6$ | $2.0 \times 10^5$ | $1.6 \times 10^7$ | $1.6 \times 10^7$ |
| <i>P. aeruginosa</i>             | 0                 | 0                 | 0                 | 0                 |

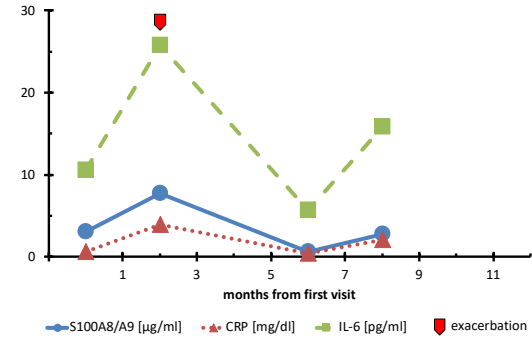

| Inflammation marker | Visit 1 | Visit 2 | Visit 3 | Visit 4 |
|---------------------|---------|---------|---------|---------|
| S100A8/A9 [µg/ml]   | 3.05    | 7.74    | 0.61    | 2.77    |
| CRP [mg/dl]         | 0.60    | 3.91    | 0.39    | 2.08    |
| IL-6 [pg/ml]        | 10.54   | 25.70   | 5.71    | 15.80   |

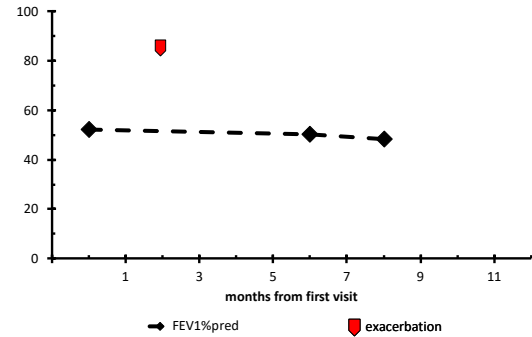

| Lung function | Visit 1 | Visit 2 | Visit 3 | Visit 4 |
|---------------|---------|---------|---------|---------|
| FEV1%pred     | 52.18   | missing | 50.15   | 48.44   |

# Patient 7

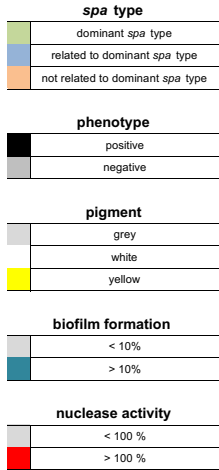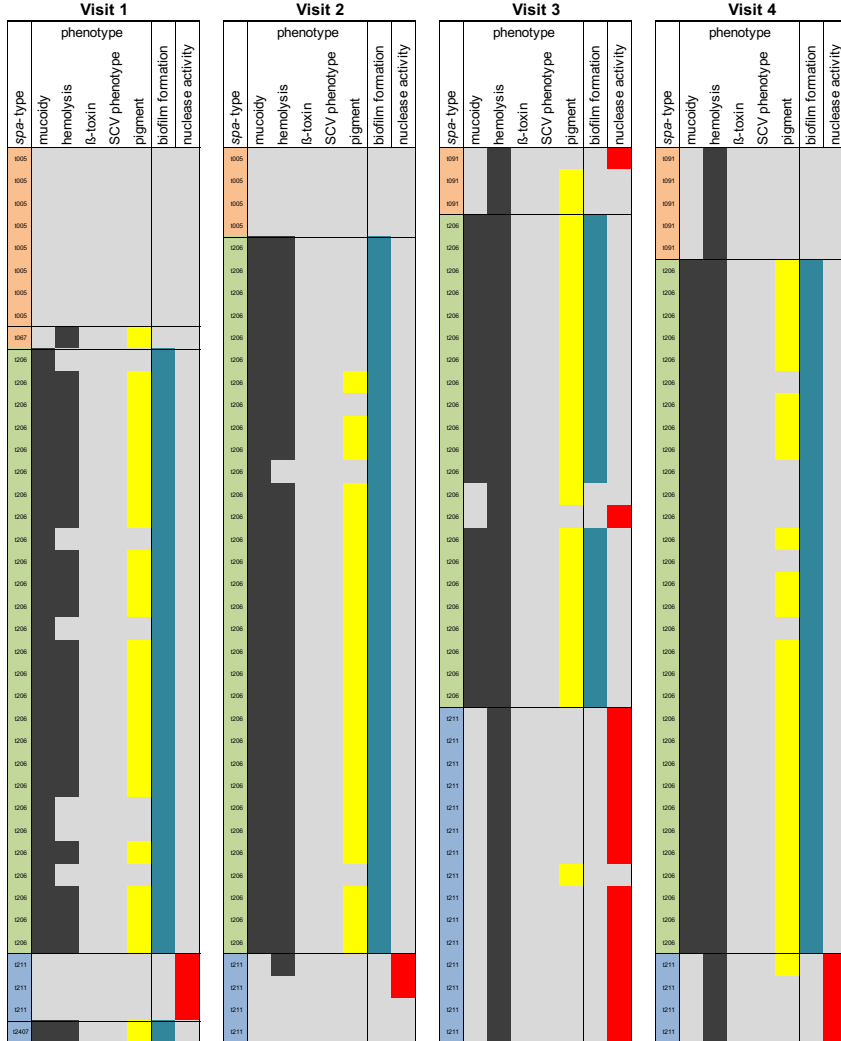

| months from first visit          | 0                 | 2                 | 6                 | 10                |
|----------------------------------|-------------------|-------------------|-------------------|-------------------|
| exacerbation                     | -                 | -                 | -                 | +                 |
| <i>P. aeruginosa</i> coinfection | negative          | negative          | negative          | negative          |
| CFU <i>S. aureus</i>             | $1.0 \times 10^3$ | $4.0 \times 10^5$ | $2.6 \times 10^5$ | $1.1 \times 10^9$ |
| CFU <i>P. aeruginosa</i>         | 0                 | 0                 | 0                 | 0                 |

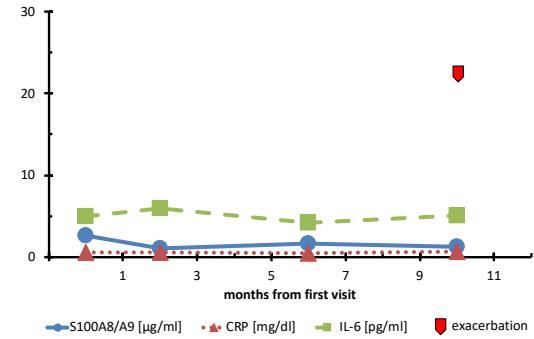

| Inflammation marker | Visit 1 | Visit 2 | Visit 3 | Visit 4 |
|---------------------|---------|---------|---------|---------|
| S100A8/A9 [µg/ml]   | 2.58    | 1.08    | 1.62    | 1.22    |
| CRP [mg/dl]         | 0.51    | 0.52    | 0.43    | 0.68    |
| IL-6 [pg/ml]        | 4.97    | 5.93    | 4.22    | 5.01    |

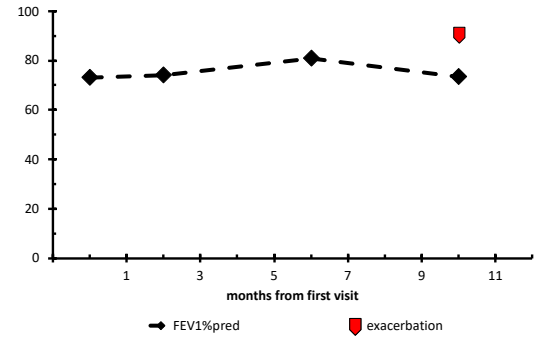

| Lung function | Visit 1 | Visit 2 | Visit 3 | Visit 4 |
|---------------|---------|---------|---------|---------|
| FEV1%pred     | 73.19   | 74.15   | 80.92   | 73.51   |

# Patient 8

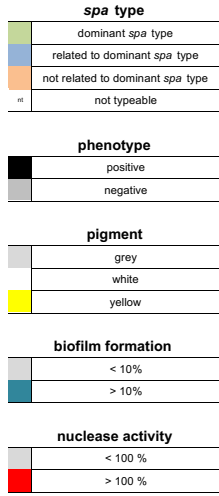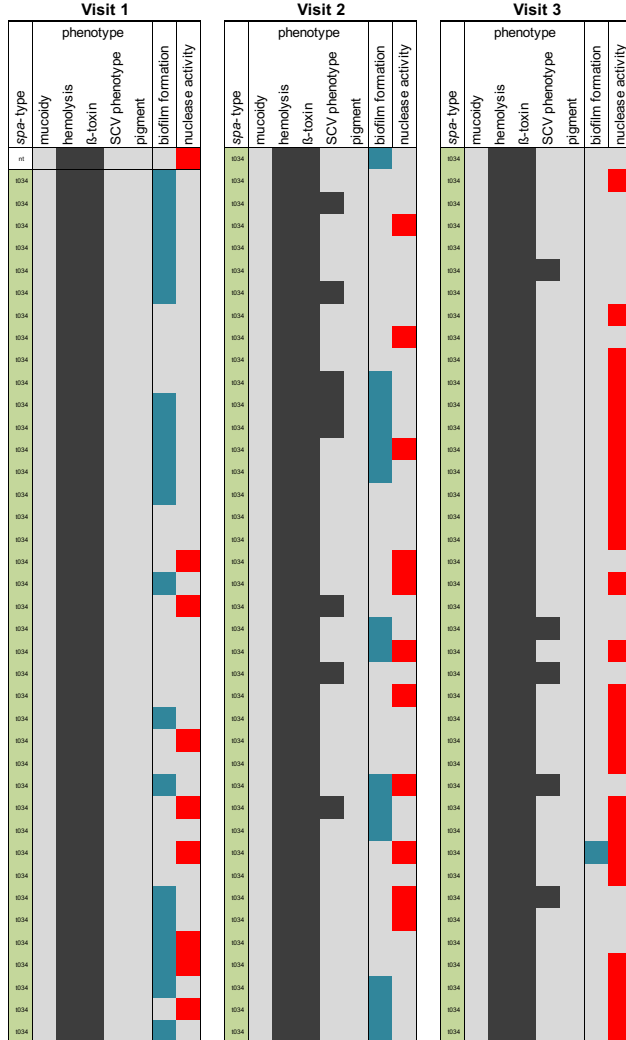

| months from first visit          | 0                 | 3                 | 9                 |
|----------------------------------|-------------------|-------------------|-------------------|
| exacerbation                     | -                 | -                 | -                 |
| <i>P. aeruginosa</i> coinfection | negative          | negative          | negative          |
| CFU <i>S. aureus</i>             | $4.0 \times 10^6$ | $2.6 \times 10^9$ | $1.0 \times 10^4$ |
| <i>P. aeruginosa</i>             | 0                 | 0                 | 0                 |

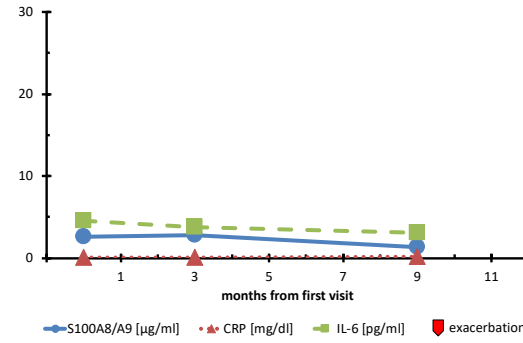

| Inflammation marker | Visit 1 | Visit 2 | Visit 3 |
|---------------------|---------|---------|---------|
| S100A8/A9 [µg/ml]   | 2.62    | 2.77    | 1.33    |
| CRP [mg/dl]         | 0.07    | 0.03    | 0.16    |
| IL-6 [pg/ml]        | 4.50    | 3.77    | 3.10    |

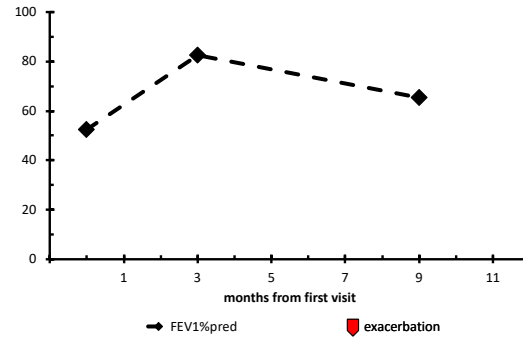

| Lung function | Visit 1 | Visit 2 | Visit 3 |
|---------------|---------|---------|---------|
| FEV1%pred     | 52.54   | 82.63   | 65.48   |

# Patient 10

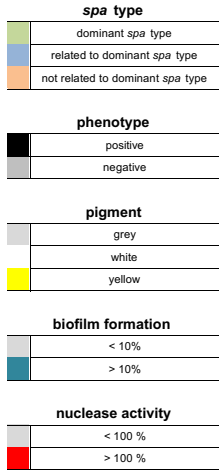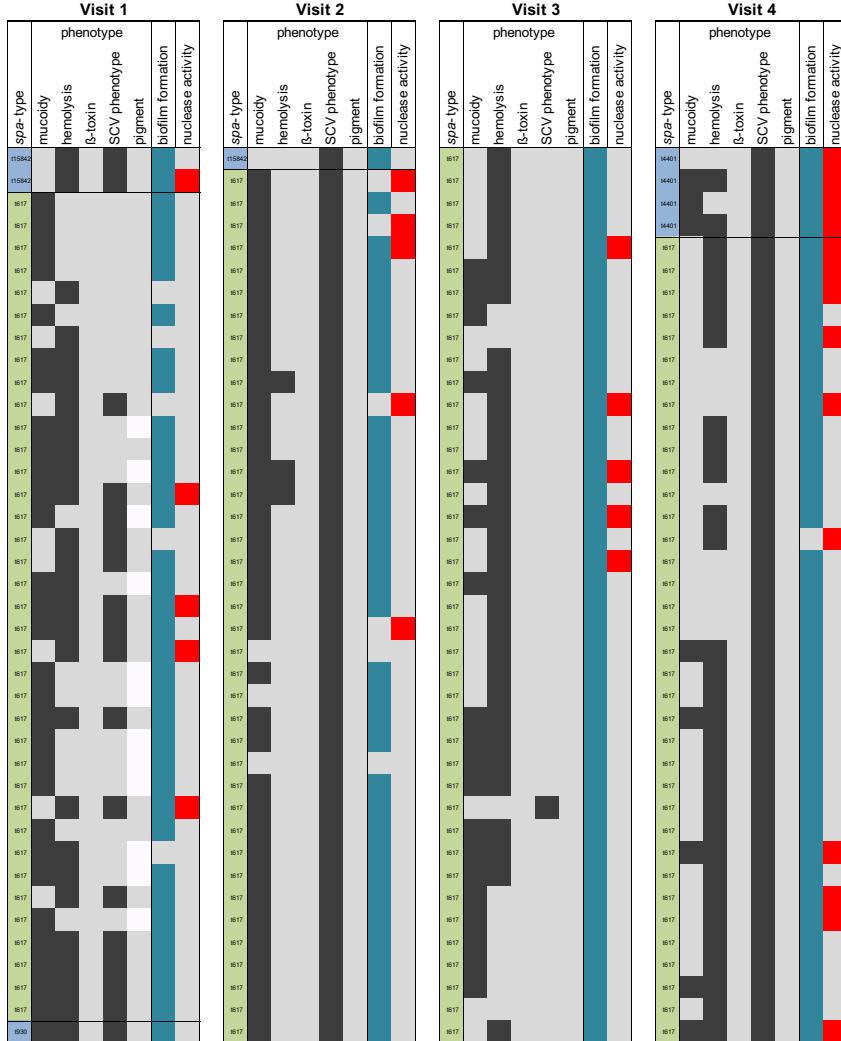

| months from first visit          | 0                 | 3                 | 6                 | 10                |
|----------------------------------|-------------------|-------------------|-------------------|-------------------|
| exacerbation                     | -                 | +                 | -                 | -                 |
| <i>P. aeruginosa</i> coinfection | negative          | negative          | negative          | negative          |
| CFU <i>S. aureus</i>             | $3.6 \times 10^5$ | $3.6 \times 10^7$ | $7.0 \times 10^5$ | $1.8 \times 10^5$ |
| CFU <i>P. aeruginosa</i>         | 0                 | 0                 | 0                 | 0                 |

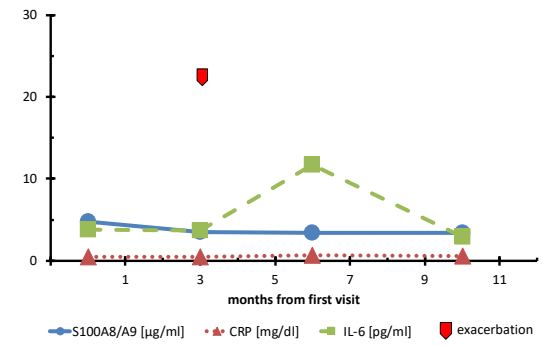

| Inflammation marker | Visit 1 | Visit 2 | Visit 3 | Visit 4 |
|---------------------|---------|---------|---------|---------|
| S100A8/A9 [μg/ml]   | 4.77    | 3.54    | 3.40    | 3.42    |
| CRP [mg/dl]         | 0.46    | 0.44    | 0.63    | 0.55    |
| IL-6 [pg/ml]        | 3.82    | 3.72    | 11.73   | 2.93    |

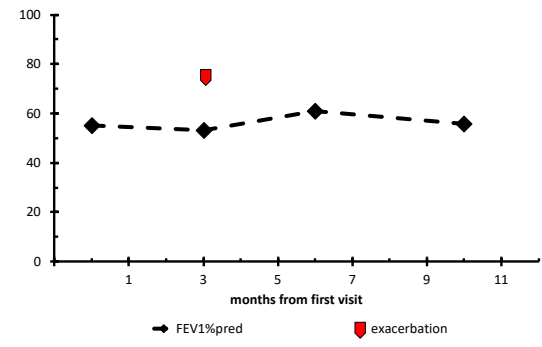

| Lung function | Visit 1 | Visit 2 | Visit 3 | Visit 4 |
|---------------|---------|---------|---------|---------|
| FEV1%pred     | 55.15   | 53.08   | 61.12   | 55.88   |



# Patient 11

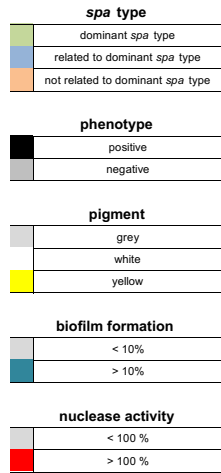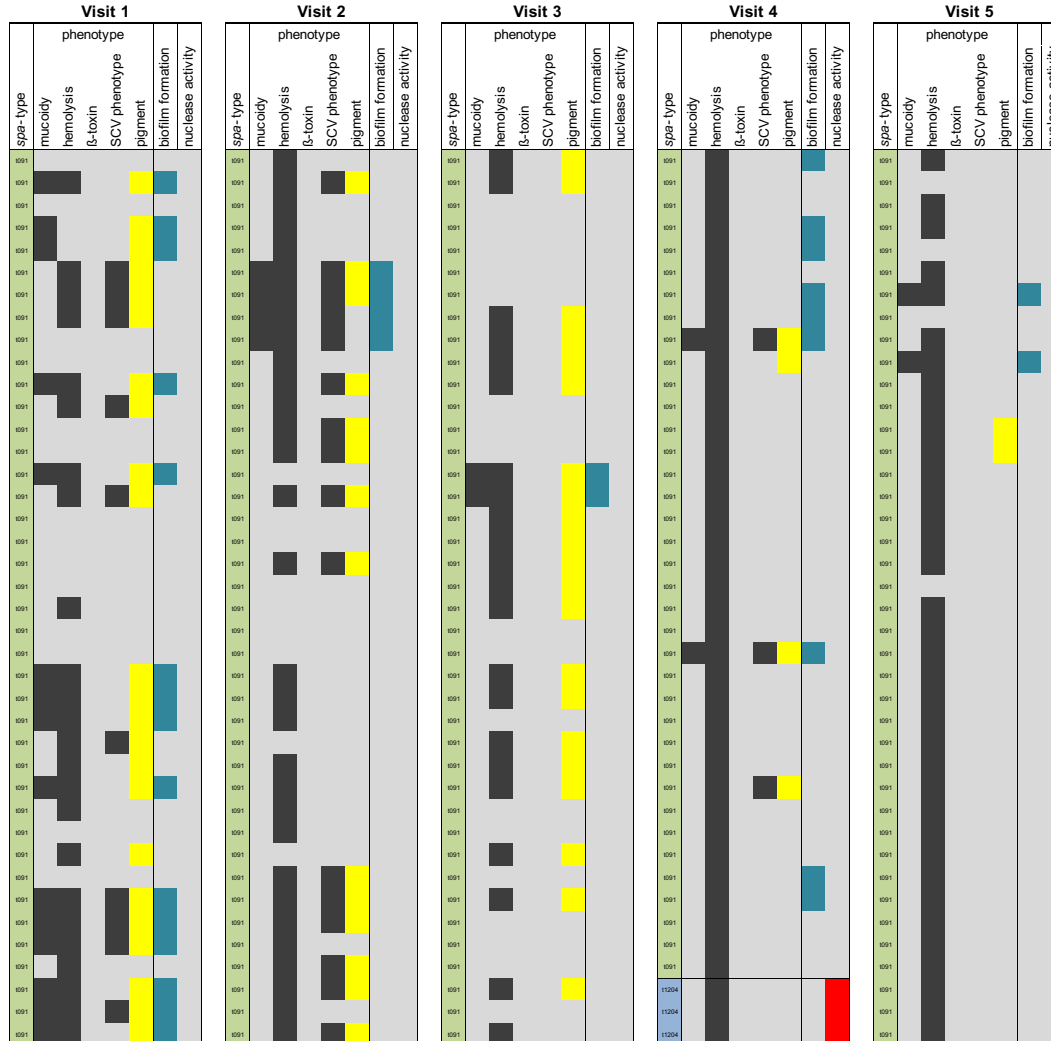

| months from first visit          | 0                 | 2                 | 4                 | 7                 | 9                 |
|----------------------------------|-------------------|-------------------|-------------------|-------------------|-------------------|
| exacerbation                     | -                 | +                 | -                 | -                 | -                 |
| <i>P. aeruginosa</i> coinfection | negative          | negative          | positive          | positive          | negative          |
| CFU <i>S. aureus</i>             | $3.2 \times 10^7$ | $2.0 \times 10^8$ | $1.2 \times 10^7$ | $1.6 \times 10^6$ | $6.4 \times 10^6$ |
| CFU <i>P. aeruginosa</i>         | 0                 | 0                 | $2.6 \times 10^4$ | $1.0 \times 10^5$ | 0                 |

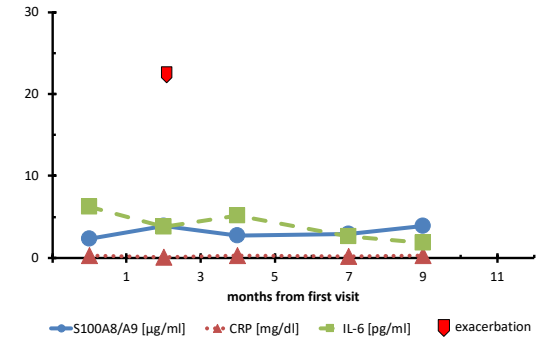

| Inflammation marker | Visit 1 | Visit 2 | Visit 3 | Visit 4 | Visit 5 |
|---------------------|---------|---------|---------|---------|---------|
| S100A8/A9 [µg/ml]   | 2.33    | 3.88    | 2.69    | 2.97    | 3.86    |
| CRP [mg/dl]         | 0.29    | 0.13    | 0.30    | 0.15    | 0.24    |
| IL-6 [pg/ml]        | 6.28    | 3.78    | 5.13    | 2.59    | 1.82    |

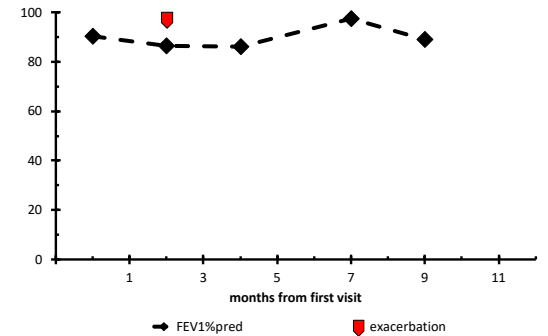

| Lung function | Visit 1 | Visit 2 | Visit 3 | Visit 4 | Visit 5 |
|---------------|---------|---------|---------|---------|---------|
| FEV1%pred     | 90.43   | 86.48   | 86.24   | 97.47   | 89.01   |

# Patient 12

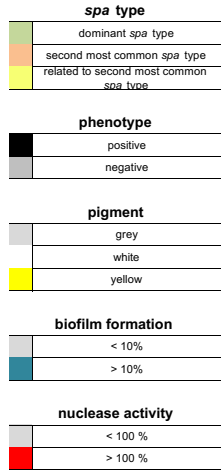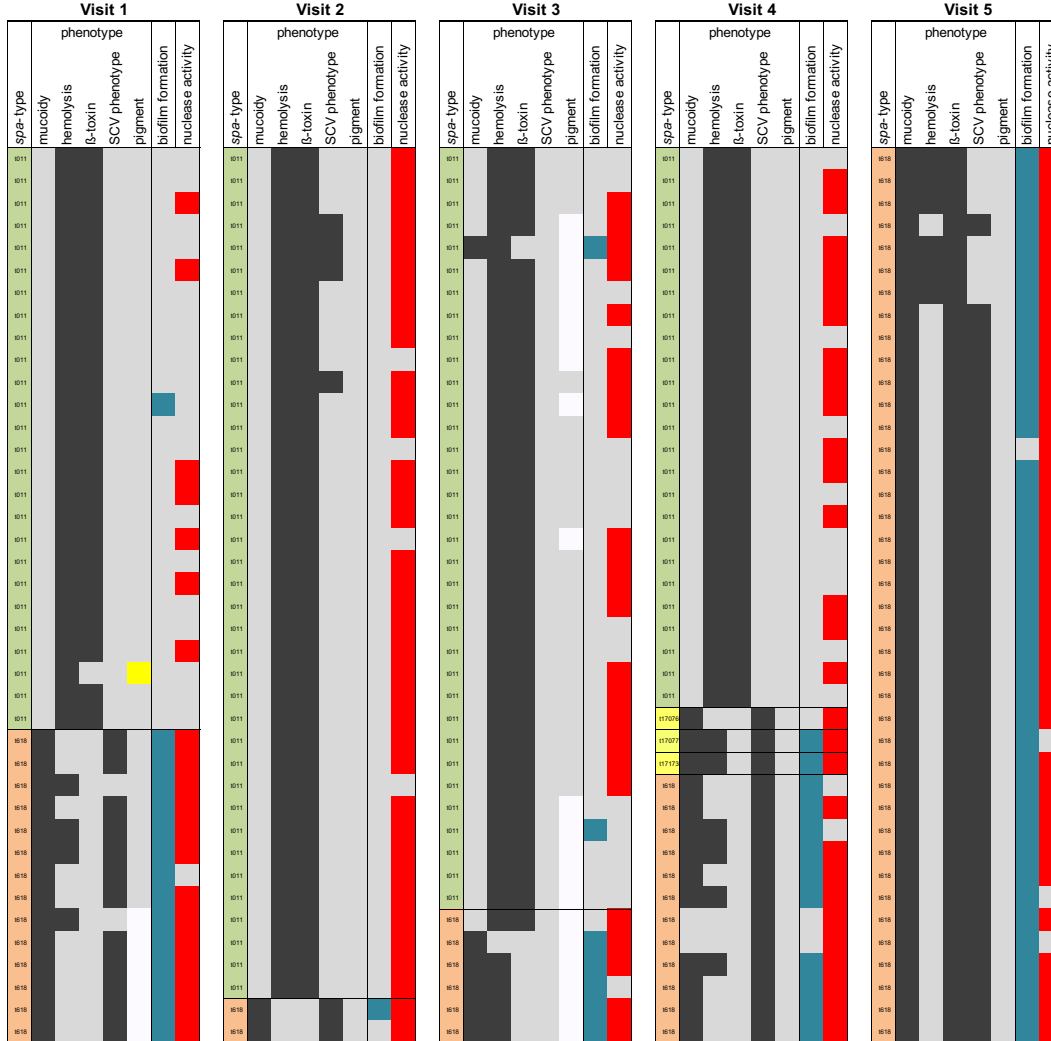

| months from first visit          | 0                 | 1                 | 2                 | 8                 | 12                |
|----------------------------------|-------------------|-------------------|-------------------|-------------------|-------------------|
| exacerbation                     | +                 | +                 | +                 | +                 | -                 |
| <i>P. aeruginosa</i> coinfection | chronic           | chronic           | chronic           | chronic           | chronic           |
| <i>S. aureus</i> CFU             | $1.0 \times 10^3$ | $3.2 \times 10^7$ | $2.4 \times 10^7$ | $2.0 \times 10^5$ | $1.0 \times 10^4$ |
| <i>P. aeruginosa</i> CFU         | $9.2 \times 10^7$ | $1.5 \times 10^8$ | $2.6 \times 10^8$ | $1.2 \times 10^7$ | $1.6 \times 10^7$ |

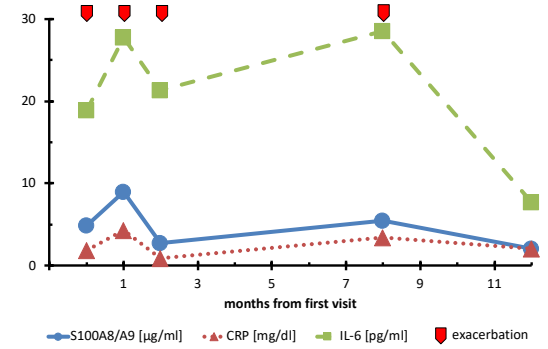

| Inflammation marker | Visit 1 | Visit 2 | Visit 3 | Visit 4 | Visit 5 |
|---------------------|---------|---------|---------|---------|---------|
| S100A8/A9 [μg/ml]   | 4.89    | 8.96    | 2.76    | 5.44    | 2.08    |
| CRP [mg/dl]         | 1.89    | 4.31    | 0.91    | 3.42    | 2.01    |
| IL-6 [pg/ml]        | 18.90   | 27.80   | 21.30   | 28.50   | 7.73    |

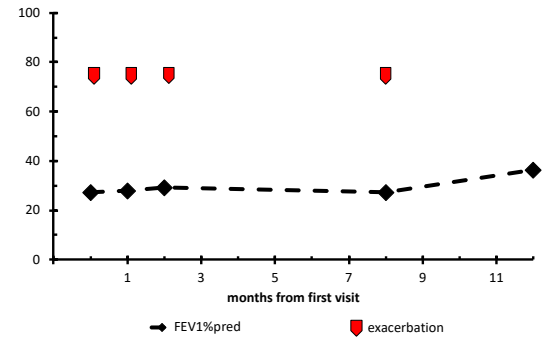

| Lung function | Visit 1 | Visit 2 | Visit 3 | Visit 4 | Visit 5 |
|---------------|---------|---------|---------|---------|---------|
| FEV1%pred     | 27.23   | 27.87   | 29.29   | 27.36   | 36.39   |

# Patient 13

| spa type                                                                                                                    |                                  |
|-----------------------------------------------------------------------------------------------------------------------------|----------------------------------|
| <span style="background-color: #c8e6c9; border: 1px solid black; width: 10px; height: 10px; display: inline-block;"></span> | dominant spa type                |
| <span style="background-color: #bbdefb; border: 1px solid black; width: 10px; height: 10px; display: inline-block;"></span> | related to dominant spa type     |
| <span style="background-color: #ffe0b2; border: 1px solid black; width: 10px; height: 10px; display: inline-block;"></span> | not related to dominant spa type |
| nt                                                                                                                          | not typeable                     |

  

| phenotype                                                                                                                 |          |
|---------------------------------------------------------------------------------------------------------------------------|----------|
| <span style="background-color: black; border: 1px solid black; width: 10px; height: 10px; display: inline-block;"></span> | positive |
| <span style="background-color: grey; border: 1px solid black; width: 10px; height: 10px; display: inline-block;"></span>  | negative |

  

| pigment                                                                                                                       |        |
|-------------------------------------------------------------------------------------------------------------------------------|--------|
| <span style="background-color: lightgrey; border: 1px solid black; width: 10px; height: 10px; display: inline-block;"></span> | grey   |
| <span style="background-color: white; border: 1px solid black; width: 10px; height: 10px; display: inline-block;"></span>     | white  |
| <span style="background-color: yellow; border: 1px solid black; width: 10px; height: 10px; display: inline-block;"></span>    | yellow |

  

| biofilm formation                                                                                                             |       |
|-------------------------------------------------------------------------------------------------------------------------------|-------|
| <span style="background-color: lightgrey; border: 1px solid black; width: 10px; height: 10px; display: inline-block;"></span> | < 10% |
| <span style="background-color: #4fc3f7; border: 1px solid black; width: 10px; height: 10px; display: inline-block;"></span>   | > 10% |

  

| nuclease activity                                                                                                             |         |
|-------------------------------------------------------------------------------------------------------------------------------|---------|
| <span style="background-color: lightgrey; border: 1px solid black; width: 10px; height: 10px; display: inline-block;"></span> | < 100 % |
| <span style="background-color: red; border: 1px solid black; width: 10px; height: 10px; display: inline-block;"></span>       | > 100 % |

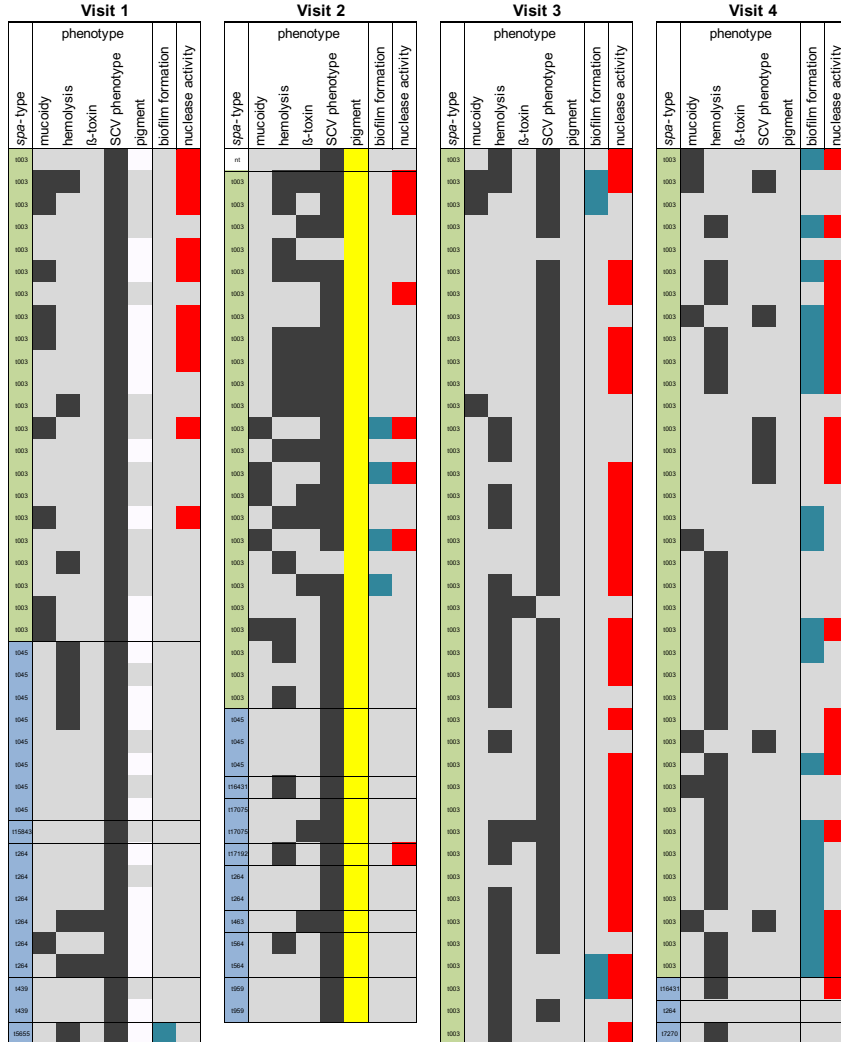

| months from first visit          | 0                 | 3                 | 6                 | 9                 |
|----------------------------------|-------------------|-------------------|-------------------|-------------------|
| exacerbation                     | -                 | -                 | -                 | -                 |
| <i>P. aeruginosa</i> coinfection | chronic           | chronic           | chronic           | chronic           |
| CFU <i>S. aureus</i>             | $4.4 \times 10^7$ | $2.8 \times 10^6$ | $4.0 \times 10^6$ | $2.7 \times 10^5$ |
| CFU <i>P. aeruginosa</i>         | $1.6 \times 10^8$ | $3.0 \times 10^7$ | $2.0 \times 10^7$ | $2.4 \times 10^7$ |

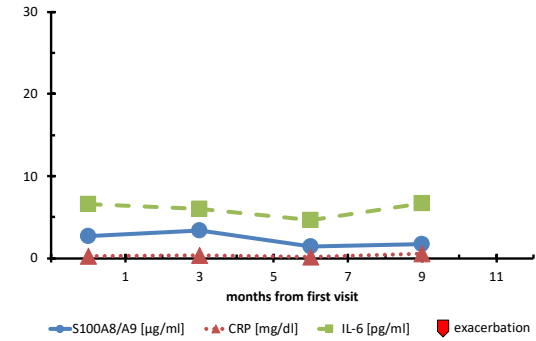

| Inflammation marker | Visit 1 | Visit 2 | Visit 3 | Visit 4 |
|---------------------|---------|---------|---------|---------|
| S100A8/A9 [µg/ml]   | 2.67    | 3.36    | 1.41    | 1.75    |
| CRP [mg/dl]         | 0.25    | 0.34    | 0.17    | 0.53    |
| IL-6 [pg/ml]        | 6.60    | 6.03    | 4.63    | 6.68    |

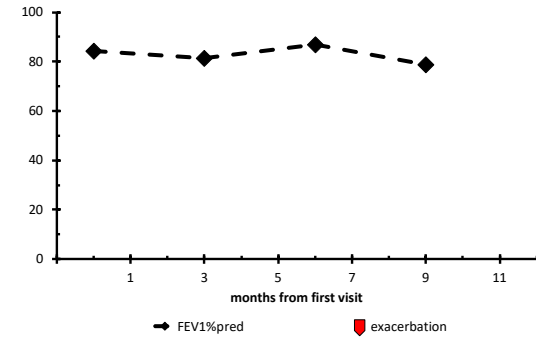

| Lung function | Visit 1 | Visit 2 | Visit 3 | Visit 4 |
|---------------|---------|---------|---------|---------|
| FEV1%pred     | 84.42   | 81.53   | 86.83   | 78.94   |

# Patient 14

**spa type**

- dominant spa type
- related to dominant spa type
- not related to dominant spa type

**phenotype**

- positive
- negative

**pigment**

- grey
- white
- yellow

**biofilm formation**

- < 10%
- > 10%

**nuclease activity**

- < 100 %
- > 100 %

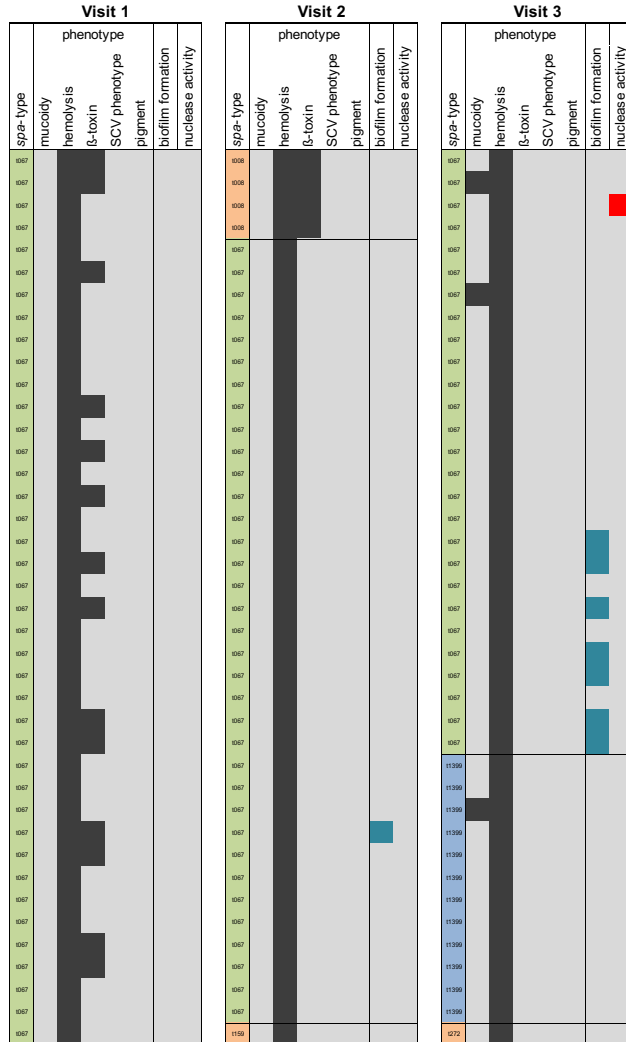

| months from first visit          | 0                 | 6                 | 11                |
|----------------------------------|-------------------|-------------------|-------------------|
| exacerbation                     | +                 | +                 | -                 |
| <i>P. aeruginosa</i> coinfection | chronic           | chronic           | chronic           |
| CFU <i>S. aureus</i>             | $1.2 \times 10^6$ | $2.0 \times 10^7$ | $2.0 \times 10^7$ |
| CFU <i>P. aeruginosa</i>         | $7.6 \times 10^7$ | $2.4 \times 10^7$ | $1.4 \times 10^8$ |

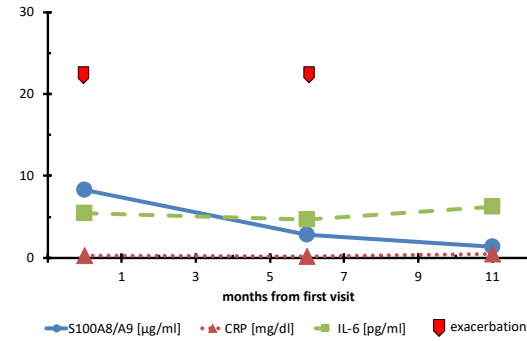

| Inflammation marker            | Visit 1 | Visit 2 | Visit 3 |
|--------------------------------|---------|---------|---------|
| S100A8/A9 [ $\mu\text{g/ml}$ ] | 8.34    | 2.82    | 1.39    |
| CRP [mg/dl]                    | 0.26    | 0.23    | 0.48    |
| IL-6 [pg/ml]                   | 5.42    | 4.69    | 6.24    |

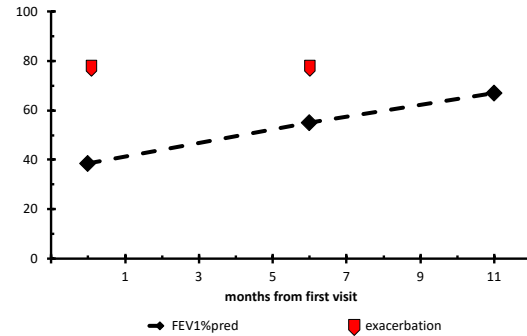

| Lung function | Visit 1 | Visit 2 | Visit 3 |
|---------------|---------|---------|---------|
| FEV1%pred     | 38.45   | 55.21   | 67.01   |
