# Supplementary material for: Association of Diverse Staphylococcus aureus Populations with Pseudomonas aeruginosa Coinfection and Inflammation in Cystic Fibrosis Airway Infection
Source: PubMed Central journal article supplement (PMC8265651; doi:10.1128/msphere.00358-21), 2021-06-23

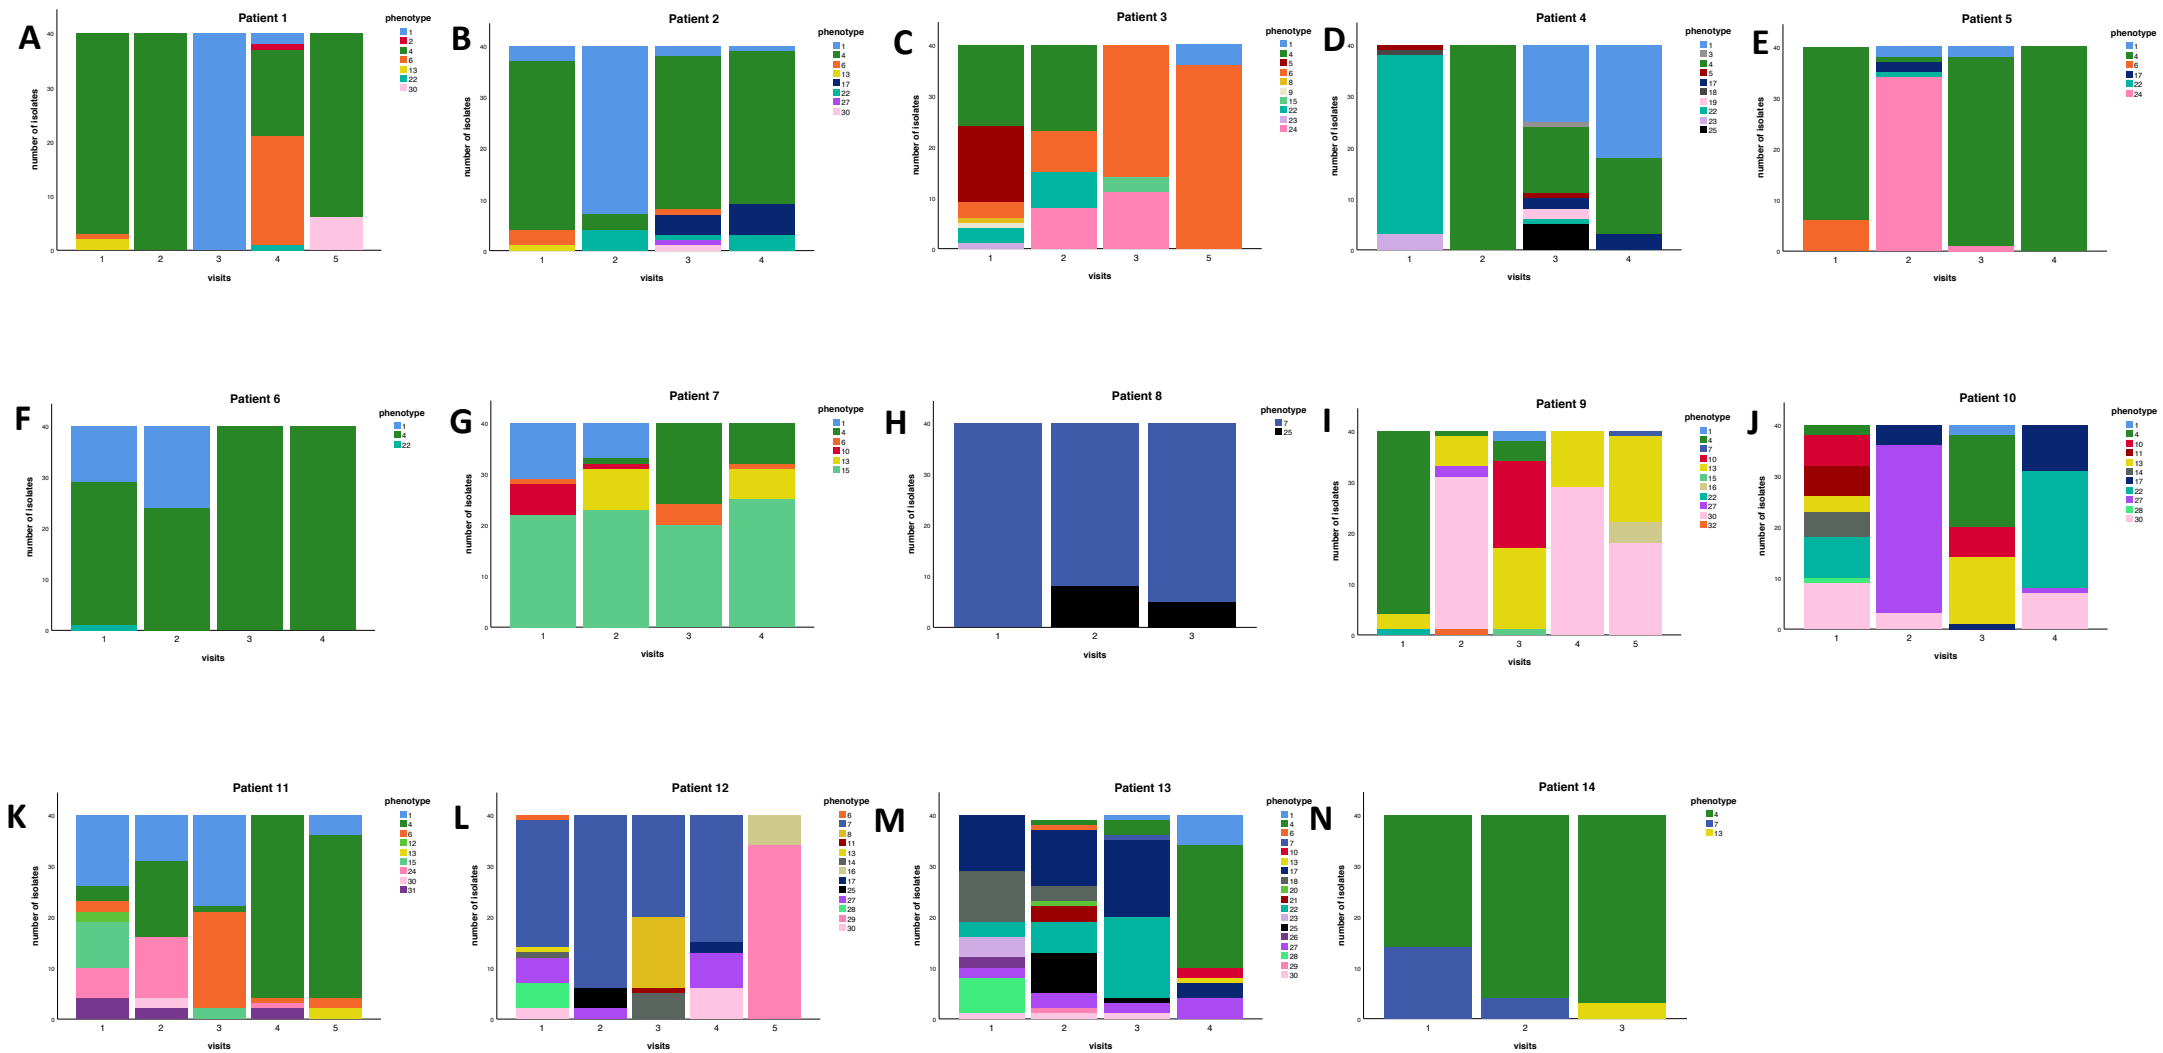

Supplement: msphere.00358-21-sf003.pdf [file msphere.00358-21-sf003.pdf]
